# Supplementary material for: Novel diagnostic biomarkers of oxidative stress, ferroptosis, immune infiltration characteristics and experimental validation in ischemic stroke
Source: Aging (Albany NY). 2024 Jan 9;16(1):746–61. doi: 10.18632/aging.205415 (PMC10817366; doi:10.18632/aging.205415)
Supplement: Supplementary Table 1 [file aging-16-205415-s001.xlsx]

## Sheet: Gene Symbol
Supplementary Table 1. 1934 OS-related genes (the relevance score ≥4.0).
Gene Symbol	Description	Relevance score
NOS3	Nitric Oxide Synthase 3	64.4818
NOS2	Nitric Oxide Synthase 2	58.5775
CPT2	Carnitine Palmitoyltransferase 2	47.1622
NOS1	Nitric Oxide Synthase 1	47.106
SOD1	Superoxide Dismutase 1	45.7088
CAT	Catalase	45.3421
TNF	Tumor Necrosis Factor	39.1695
NFE2L2	NFE2 Like BZIP Transcription Factor 2	38.0799
HMOX1	Heme Oxygenase 1	37.9466
RYR2	Ryanodine Receptor 2	37.9273
TP53	Tumor Protein P53	37.4686
OXSR1	Oxidative Stress Responsive Kinase 1	35.0162
AIFM1	Apoptosis Inducing Factor Mitochondria Associated 1	34.9614
SOD2	Superoxide Dismutase 2	34.7254
GFM1	G Elongation Factor Mitochondrial 1	33.4987
ELAC2	ElaC Ribonuclease Z 2	32.3522
MAPK14	Mitogen-Activated Protein Kinase 14	32.2106
CARS2	Cysteinyl-TRNA Synthetase 2, Mitochondrial	32.1358
GSR	Glutathione-Disulfide Reductase	32.0628
FARS2	Phenylalanyl-TRNA Synthetase 2, Mitochondrial	32.027
OSGIN1	Oxidative Stress Induced Growth Inhibitor 1	31.7849
MAPK8	Mitogen-Activated Protein Kinase 8	31.0265
MPO	Myeloperoxidase	30.0791
AARS2	Alanyl-TRNA Synthetase 2, Mitochondrial	29.9681
XDH	Xanthine Dehydrogenase	29.7263
OSER1	Oxidative Stress Responsive Serine Rich 1	29.6741
TXN	Thioredoxin	28.1836
IL6	Interleukin 6	28.141
MTO1	Mitochondrial TRNA Translation Optimization 1	28.1402
OSGIN2	Oxidative Stress Induced Growth Inhibitor Family Member 2	27.2973
EARS2	Glutamyl-TRNA Synthetase 2, Mitochondrial	27.1517
MAPK1	Mitogen-Activated Protein Kinase 1	26.7364
TUFM	Tu Translation Elongation Factor, Mitochondrial	26.2838
PARK7	Parkinsonism Associated Deglycase	26.0413
VARS2	Valyl-TRNA Synthetase 2, Mitochondrial	25.9122
OLR1	Oxidized Low Density Lipoprotein Receptor 1	25.9084
PNPT1	Polyribonucleotide Nucleotidyltransferase 1	25.5341
G6PD	Glucose-6-Phosphate Dehydrogenase	25.4359
CASQ2	Calsequestrin 2	25.4084
IL1B	Interleukin 1 Beta	25.3174
TSFM	Ts Translation Elongation Factor, Mitochondrial	25.2848
SIRT1	Sirtuin 1	24.8235
MTFMT	Mitochondrial Methionyl-TRNA Formyltransferase	24.7771
CYCS	Cytochrome C, Somatic	24.162
TXN2	Thioredoxin 2	23.8075
CASP3	Caspase 3	23.7538
NQO1	NAD(P)H Quinone Dehydrogenase 1	23.0866
PON1	Paraoxonase 1	23.0862
GPX1	Glutathione Peroxidase 1	22.6415
PTGS2	Prostaglandin-Endoperoxide Synthase 2	22.4342
APP	Amyloid Beta Precursor Protein	22.3638
CALM1	Calmodulin 1	22.3547
CXCL8	C-X-C Motif Chemokine Ligand 8	22.2992
NOS1AP	Nitric Oxide Synthase 1 Adaptor Protein	22.2233
ALB	Albumin	22.2016
HSPA5	Heat Shock Protein Family A (Hsp70) Member 5	22.1114
CRP	C-Reactive Protein	21.9305
MAP3K5	Mitogen-Activated Protein Kinase Kinase Kinase 5	21.8853
MRPL44	Mitochondrial Ribosomal Protein L44	21.8721
SLC6A4	Solute Carrier Family 6 Member 4	21.8176
CYBA	Cytochrome B-245 Alpha Chain	21.5468
CRH	Corticotropin Releasing Hormone	21.422
MTRFR	Mitochondrial Translation Release Factor In Rescue	21.3949
ACADVL	Acyl-CoA Dehydrogenase Very Long Chain	21.3782
HADHA	Hydroxyacyl-CoA Dehydrogenase Trifunctional Multienzyme Complex Subunit Alpha	21.3328
POLR1C	RNA Polymerase I And III Subunit C	21.2511
GFM2	GTP Dependent Ribosome Recycling Factor Mitochondrial 2	21.209
INS	Insulin	21.1693
FOXO3	Forkhead Box O3	21.1658
JUN	Jun Proto-Oncogene, AP-1 Transcription Factor Subunit	21.1493
GSTM1	Glutathione S-Transferase Mu 1	21.1167
GTPBP3	GTP Binding Protein 3, Mitochondrial	21.1078
OGG1	8-Oxoguanine DNA Glycosylase	20.9293
HADHB	Hydroxyacyl-CoA Dehydrogenase Trifunctional Multienzyme Complex Subunit Beta	20.8485
G3BP1	G3BP Stress Granule Assembly Factor 1	20.8047
XBP1	X-Box Binding Protein 1	20.6578
RYR1	Ryanodine Receptor 1	20.5675
DDIT3	DNA Damage Inducible Transcript 3	20.4987
ADPRS	ADP-Ribosylserine Hydrolase	20.3642
GSTP1	Glutathione S-Transferase Pi 1	20.2557
FOXO1	Forkhead Box O1	20.1976
ATF4	Activating Transcription Factor 4	20.1649
PRDX2	Peroxiredoxin 2	20.0037
PARP1	Poly(ADP-Ribose) Polymerase 1	19.9915
HSF1	Heat Shock Transcription Factor 1	19.9178
HSP90AA1	Heat Shock Protein 90 Alpha Family Class A Member 1	19.841
AKT1	AKT Serine/Threonine Kinase 1	19.7682
ACADM	Acyl-CoA Dehydrogenase Medium Chain	19.6726
KEAP1	Kelch Like ECH Associated Protein 1	19.5866
HSPA4	Heat Shock Protein Family A (Hsp70) Member 4	19.5243
TRDN	Triadin	19.4434
TARS2	Threonyl-TRNA Synthetase 2, Mitochondrial	19.4118
MSRA	Methionine Sulfoxide Reductase A	19.3876
EDN1	Endothelin 1	19.3454
EIF2AK3	Eukaryotic Translation Initiation Factor 2 Alpha Kinase 3	19.3328
CYP2D6	Cytochrome P450 Family 2 Subfamily D Member 6	19.3121
MIPEP	Mitochondrial Intermediate Peptidase	19.2003
IFNG	Interferon Gamma	19.1866
HSPB1	Heat Shock Protein Family B (Small) Member 1	19.1689
CYBB	Cytochrome B-245 Beta Chain	19.1495
CYP3A4	Cytochrome P450 Family 3 Subfamily A Member 4	19.0598
PRKN	Parkin RBR E3 Ubiquitin Protein Ligase	18.9821
GAPDH	Glyceraldehyde-3-Phosphate Dehydrogenase	18.8664
BCL2	BCL2 Apoptosis Regulator	18.851
CPT1A	Carnitine Palmitoyltransferase 1A	18.8211
MAPK10	Mitogen-Activated Protein Kinase 10	18.7917
NFS1	NFS1 Cysteine Desulfurase	18.7553
PRDX5	Peroxiredoxin 5	18.5815
EIF2S1	Eukaryotic Translation Initiation Factor 2 Subunit Alpha	18.5185
BDNF	Brain Derived Neurotrophic Factor	18.4871
FMO3	Flavin Containing Dimethylaniline Monoxygenase 3	18.2767
VEGFA	Vascular Endothelial Growth Factor A	18.2197
CCL2	C-C Motif Chemokine Ligand 2	18.1868
NDUFS4	NADH:Ubiquinone Oxidoreductase Subunit S4	18.0905
CYP1A2	Cytochrome P450 Family 1 Subfamily A Member 2	18.0667
FASTKD2	FAST Kinase Domains 2	17.9996
STIP1	Stress Induced Phosphoprotein 1	17.9388
APEX1	Apurinic/Apyrimidinic Endodeoxyribonuclease 1	17.9058
SNCA	Synuclein Alpha	17.8405
HIF1A	Hypoxia Inducible Factor 1 Subunit Alpha	17.7483
HSPA1A	Heat Shock Protein Family A (Hsp70) Member 1A	17.602
QRSL1	Glutaminyl-TRNA Amidotransferase Subunit QRSL1	17.518
ACE	Angiotensin I Converting Enzyme	17.4938
TGFB1	Transforming Growth Factor Beta 1	17.4887
ABL1	ABL Proto-Oncogene 1, Non-Receptor Tyrosine Kinase	17.3891
MAOA	Monoamine Oxidase A	17.304
CYP1A1	Cytochrome P450 Family 1 Subfamily A Member 1	17.2424
FOS	Fos Proto-Oncogene, AP-1 Transcription Factor Subunit	17.1921
ESR1	Estrogen Receptor 1	17.127
NFKB1	Nuclear Factor Kappa B Subunit 1	17.103
HSD17B4	Hydroxysteroid 17-Beta Dehydrogenase 4	17.1013
BAX	BCL2 Associated X, Apoptosis Regulator	17.0708
ATP5F1A	ATP Synthase F1 Subunit Alpha	17.0145
CP	Ceruloplasmin	17.0114
NR3C1	Nuclear Receptor Subfamily 3 Group C Member 1	16.994
ACADS	Acyl-CoA Dehydrogenase Short Chain	16.9745
MRPS34	Mitochondrial Ribosomal Protein S34	16.9403
VWF	Von Willebrand Factor	16.8691
PRDX6	Peroxiredoxin 6	16.7971
POMC	Proopiomelanocortin	16.7631
CAV1	Caveolin 1	16.7611
GSTT1	Glutathione S-Transferase Theta 1	16.692
HBG2	Hemoglobin Subunit Gamma 2	16.6653
SOD3	Superoxide Dismutase 3	16.607
SELENON	Selenoprotein N	16.6021
MRPS22	Mitochondrial Ribosomal Protein S22	16.5599
KNG1	Kininogen 1	16.545
NUDT1	Nudix Hydrolase 1	16.502
TRMT10C	TRNA Methyltransferase 10C, Mitochondrial RNase P Subunit	16.458
NPY	Neuropeptide Y	16.4496
SDHB	Succinate Dehydrogenase Complex Iron Sulfur Subunit B	16.4447
PLA2G7	Phospholipase A2 Group VII	16.4131
MRPL12	Mitochondrial Ribosomal Protein L12	16.3534
VARS1	Valyl-TRNA Synthetase 1	16.3464
MAPK9	Mitogen-Activated Protein Kinase 9	16.2578
G3BP2	G3BP Stress Granule Assembly Factor 2	16.2426
SDHA	Succinate Dehydrogenase Complex Flavoprotein Subunit A	16.1967
SERP1	Stress Associated Endoplasmic Reticulum Protein 1	16.0739
CAV3	Caveolin 3	16.0733
CYP2E1	Cytochrome P450 Family 2 Subfamily E Member 1	16.0616
CALM3	Calmodulin 3	16.0495
IL10	Interleukin 10	16.013
PPARG	Peroxisome Proliferator Activated Receptor Gamma	15.9039
C1QBP	Complement C1q Binding Protein	15.846
TLR4	Toll Like Receptor 4	15.8433
PRKCD	Protein Kinase C Delta	15.8361
ICAM1	Intercellular Adhesion Molecule 1	15.7931
APOE	Apolipoprotein E	15.7713
ACOX1	Acyl-CoA Oxidase 1	15.5621
PRDX3	Peroxiredoxin 3	15.4785
CRHR1	Corticotropin Releasing Hormone Receptor 1	15.4561
CREB1	CAMP Responsive Element Binding Protein 1	15.4309
ATF6	Activating Transcription Factor 6	15.4234
ACAD9	Acyl-CoA Dehydrogenase Family Member 9	15.4187
MAOB	Monoamine Oxidase B	15.3825
SHC1	SHC Adaptor Protein 1	15.3767
ATM	ATM Serine/Threonine Kinase	15.3252
EHHADH	Enoyl-CoA Hydratase And 3-Hydroxyacyl CoA Dehydrogenase	15.2403
ACADL	Acyl-CoA Dehydrogenase Long Chain	15.2169
SCN5A	Sodium Voltage-Gated Channel Alpha Subunit 5	15.1595
PPARGC1A	PPARG Coactivator 1 Alpha	15.1465
PRDX1	Peroxiredoxin 1	15.1229
MRPS2	Mitochondrial Ribosomal Protein S2	15.0905
TRPM2	Transient Receptor Potential Cation Channel Subfamily M Member 2	14.9569
CLU	Clusterin	14.8891
OXR1	Oxidation Resistance 1	14.8628
PTCD3	Pentatricopeptide Repeat Domain 3	14.8419
KCNJ5	Potassium Inwardly Rectifying Channel Subfamily J Member 5	14.8039
MAPK3	Mitogen-Activated Protein Kinase 3	14.7554
SQSTM1	Sequestosome 1	14.7327
COX5A	Cytochrome C Oxidase Subunit 5A	14.6285
PINK1	PTEN Induced Kinase 1	14.55
ERN1	Endoplasmic Reticulum To Nucleus Signaling 1	14.53
VCAM1	Vascular Cell Adhesion Molecule 1	14.4472
CACNA1C	Calcium Voltage-Gated Channel Subunit Alpha1 C	14.4284
HSPA8	Heat Shock Protein Family A (Hsp70) Member 8	14.4114
ADIPOQ	Adiponectin, C1Q And Collagen Domain Containing	14.4012
ETFDH	Electron Transfer Flavoprotein Dehydrogenase	14.3921
MTOR	Mechanistic Target Of Rapamycin Kinase	14.3657
UCP2	Uncoupling Protein 2	14.3331
GATB	Glutamyl-TRNA Amidotransferase Subunit B	14.3263
ADRB2	Adrenoceptor Beta 2	14.302
OXT	Oxytocin/Neurophysin I Prepropeptide	14.2998
GPX3	Glutathione Peroxidase 3	14.2374
GATC	Glutamyl-TRNA Amidotransferase Subunit C	14.2165
IL1A	Interleukin 1 Alpha	14.2111
SLC25A20	Solute Carrier Family 25 Member 20	14.2094
HADH	Hydroxyacyl-CoA Dehydrogenase	14.1297
EIF2AK2	Eukaryotic Translation Initiation Factor 2 Alpha Kinase 2	14.1277
ALDH2	Aldehyde Dehydrogenase 2 Family Member	14.0874
AGT	Angiotensinogen	14.0583
LYRM4	LYR Motif Containing 4	14.0413
SNTA1	Syntrophin Alpha 1	14.0367
MRPS16	Mitochondrial Ribosomal Protein S16	14.0117
PDE5A	Phosphodiesterase 5A	13.9982
P4HB	Prolyl 4-Hydroxylase Subunit Beta	13.9585
PRKAA1	Protein Kinase AMP-Activated Catalytic Subunit Alpha 1	13.9543
PRKAA2	Protein Kinase AMP-Activated Catalytic Subunit Alpha 2	13.9445
APOA1	Apolipoprotein A1	13.9003
FXN	Frataxin	13.7781
TIMM22	Translocase Of Inner Mitochondrial Membrane 22	13.7511
MSRB2	Methionine Sulfoxide Reductase B2	13.7407
EIF2AK1	Eukaryotic Translation Initiation Factor 2 Alpha Kinase 1	13.7365
SDHD	Succinate Dehydrogenase Complex Subunit D	13.696
AGTR1	Angiotensin II Receptor Type 1	13.6912
BRCA2	BRCA2 DNA Repair Associated	13.6452
NR3C2	Nuclear Receptor Subfamily 3 Group C Member 2	13.616
KCNH2	Potassium Voltage-Gated Channel Subfamily H Member 2	13.605
ABCD1	ATP Binding Cassette Subfamily D Member 1	13.5991
NOX4	NADPH Oxidase 4	13.5887
LEP	Leptin	13.5668
LMNA	Lamin A/C	13.5299
NDUFS8	NADH:Ubiquinone Oxidoreductase Core Subunit S8	13.5289
CD36	CD36 Molecule	13.5231
GPX7	Glutathione Peroxidase 7	13.5135
TXNIP	Thioredoxin Interacting Protein	13.499
GCH1	GTP Cyclohydrolase 1	13.4842
MAP2K4	Mitogen-Activated Protein Kinase Kinase 4	13.4485
PPARA	Peroxisome Proliferator Activated Receptor Alpha	13.4162
CDKN1A	Cyclin Dependent Kinase Inhibitor 1A	13.3542
PTGS1	Prostaglandin-Endoperoxide Synthase 1	13.3357
CASP9	Caspase 9	13.2869
MICOS13	Mitochondrial Contact Site And Cristae Organizing System Subunit 13	13.2774
COMT	Catechol-O-Methyltransferase	13.2194
BLVRB	Biliverdin Reductase B	13.2
CYP2C9	Cytochrome P450 Family 2 Subfamily C Member 9	13.1928
CYP1B1	Cytochrome P450 Family 1 Subfamily B Member 1	13.1885
STAT3	Signal Transducer And Activator Of Transcription 3	13.0677
MRPL3	Mitochondrial Ribosomal Protein L3	13.056
SP1	Sp1 Transcription Factor	13.0479
GLRX	Glutaredoxin	13.0441
KCNE1	Potassium Voltage-Gated Channel Subfamily E Regulatory Subunit 1	13.0291
FMO1	Flavin Containing Dimethylaniline Monoxygenase 1	13.0121
NOX1	NADPH Oxidase 1	13.0054
SRC	SRC Proto-Oncogene, Non-Receptor Tyrosine Kinase	12.9965
SFXN4	Sideroflexin 4	12.9883
ETFA	Electron Transfer Flavoprotein Subunit Alpha	12.9544
KCNQ1	Potassium Voltage-Gated Channel Subfamily Q Member 1	12.8752
MSRB1	Methionine Sulfoxide Reductase B1	12.8607
MRPS7	Mitochondrial Ribosomal Protein S7	12.8335
MB	Myoglobin	12.8286
HMGB1	High Mobility Group Box 1	12.8147
CS	Citrate Synthase	12.8124
CALM2	Calmodulin 2	12.8087
ALOX5	Arachidonate 5-Lipoxygenase	12.8083
SELE	Selectin E	12.7924
MDM2	MDM2 Proto-Oncogene	12.7896
MAP2K6	Mitogen-Activated Protein Kinase Kinase 6	12.7539
MMP2	Matrix Metallopeptidase 2	12.7423
SELP	Selectin P	12.7053
PRDX4	Peroxiredoxin 4	12.704
RHOA	Ras Homolog Family Member A	12.6859
ANK2	Ankyrin 2	12.6814
TXNRD1	Thioredoxin Reductase 1	12.6349
HBB	Hemoglobin Subunit Beta	12.626
PON2	Paraoxonase 2	12.6194
MRPS25	Mitochondrial Ribosomal Protein S25	12.6105
MT-CO1	Mitochondrially Encoded Cytochrome C Oxidase I	12.6039
MAPKAPK2	MAPK Activated Protein Kinase 2	12.5979
NCF2	Neutrophil Cytosolic Factor 2	12.5945
ATF2	Activating Transcription Factor 2	12.5917
CYP2C19	Cytochrome P450 Family 2 Subfamily C Member 19	12.5473
POR	Cytochrome P450 Oxidoreductase	12.542
CHAT	Choline O-Acetyltransferase	12.5183
MAPK11	Mitogen-Activated Protein Kinase 11	12.5117
EPO	Erythropoietin	12.4687
POLG	DNA Polymerase Gamma, Catalytic Subunit	12.4552
SERPINE1	Serpin Family E Member 1	12.3309
HMOX2	Heme Oxygenase 2	12.2852
VCP	Valosin Containing Protein	12.2804
STK25	Serine/Threonine Kinase 25	12.2796
AGER	Advanced Glycosylation End-Product Specific Receptor	12.2297
PTGIS	Prostaglandin I2 Synthase	12.2281
UCP3	Uncoupling Protein 3	12.2111
TPO	Thyroid Peroxidase	12.1649
MRPS28	Mitochondrial Ribosomal Protein S28	12.1277
HTR2A	5-Hydroxytryptamine Receptor 2A	12.0917
CYGB	Cytoglobin	12.0764
ATP2A2	ATPase Sarcoplasmic/Endoplasmic Reticulum Ca2+ Transporting 2	12.0502
FKBP5	FKBP Prolyl Isomerase 5	12.044
PIK3CG	Phosphatidylinositol-4,5-Bisphosphate 3-Kinase Catalytic Subunit Gamma	12.0415
MRPS23	Mitochondrial Ribosomal Protein S23	11.9993
PSEN1	Presenilin 1	11.9964
OXTR	Oxytocin Receptor	11.992
BRCA1	BRCA1 DNA Repair Associated	11.9299
MAPT	Microtubule Associated Protein Tau	11.8334
SGCB	Sarcoglycan Beta	11.8154
VHL	Von Hippel-Lindau Tumor Suppressor	11.7875
EME2	Essential Meiotic Structure-Specific Endonuclease Subunit 2	11.7404
NOSTRIN	Nitric Oxide Synthase Trafficking	11.7344
DDAH2	Dimethylarginine Dimethylaminohydrolase 2	11.7184
MRPS14	Mitochondrial Ribosomal Protein S14	11.7148
GPX4	Glutathione Peroxidase 4	11.698
EPHX1	Epoxide Hydrolase 1	11.6788
ADCYAP1	Adenylate Cyclase Activating Polypeptide 1	11.6687
SESN2	Sestrin 2	11.6596
FAS	Fas Cell Surface Death Receptor	11.6374
POLRMT	RNA Polymerase Mitochondrial	11.6346
HERPUD1	Homocysteine Inducible ER Protein With Ubiquitin Like Domain 1	11.5971
GCLC	Glutamate-Cysteine Ligase Catalytic Subunit	11.5565
MAP2K3	Mitogen-Activated Protein Kinase Kinase 3	11.4821
PRKCB	Protein Kinase C Beta	11.4606
GGT1	Gamma-Glutamyltransferase 1	11.4537
CDKN2A	Cyclin Dependent Kinase Inhibitor 2A	11.433
IGF1	Insulin Like Growth Factor 1	11.4311
TF	Transferrin	11.4197
SUOX	Sulfite Oxidase	11.3624
MTHFR	Methylenetetrahydrofolate Reductase	11.3419
ADH5	Alcohol Dehydrogenase 5 (Class III), Chi Polypeptide	11.3362
ATF3	Activating Transcription Factor 3	11.3016
ASL	Argininosuccinate Lyase	11.2755
SIRT2	Sirtuin 2	11.2715
KDR	Kinase Insert Domain Receptor	11.2711
EPRS1	Glutamyl-Prolyl-TRNA Synthetase 1	11.2701
SIRT3	Sirtuin 3	11.2682
NFE2L1	NFE2 Like BZIP Transcription Factor 1	11.2607
IL18	Interleukin 18	11.2451
TARDBP	TAR DNA Binding Protein	11.2366
JAK2	Janus Kinase 2	11.222
SRXN1	Sulfiredoxin 1	11.2061
UQCRFS1	Ubiquinol-Cytochrome C Reductase, Rieske Iron-Sulfur Polypeptide 1	11.1887
NDUFS2	NADH:Ubiquinone Oxidoreductase Core Subunit S2	11.1869
NOSIP	Nitric Oxide Synthase Interacting Protein	11.1828
ARG1	Arginase 1	11.1653
SLC2A1	Solute Carrier Family 2 Member 1	11.1559
MMP9	Matrix Metallopeptidase 9	11.1375
C2orf69	Chromosome 2 Open Reading Frame 69	11.1203
TERT	Telomerase Reverse Transcriptase	11.0939
TTN	Titin	11.0734
RPS6KA5	Ribosomal Protein S6 Kinase A5	11.0718
TIA1	TIA1 Cytotoxic Granule Associated RNA Binding Protein	11.0678
ETFB	Electron Transfer Flavoprotein Subunit Beta	11.0609
LONP1	Lon Peptidase 1, Mitochondrial	11.0459
CALCA	Calcitonin Related Polypeptide Alpha	11.0316
ARG2	Arginase 2	11.0013
KRIT1	KRIT1 Ankyrin Repeat Containing	10.9985
HSD17B10	Hydroxysteroid 17-Beta Dehydrogenase 10	10.9951
REN	Renin	10.9938
CYP2B6	Cytochrome P450 Family 2 Subfamily B Member 6	10.9883
NPPA	Natriuretic Peptide A	10.9609
ANXA5	Annexin A5	10.9327
MT-CYB	Mitochondrially Encoded Cytochrome B	10.9052
LOC110806262	Solute Carrier Family 6 Member 4 Gene Promoter	10.87
MAP2K7	Mitogen-Activated Protein Kinase Kinase 7	10.8554
NGB	Neuroglobin	10.8271
GHRL	Ghrelin And Obestatin Prepropeptide	10.8265
GSTA1	Glutathione S-Transferase Alpha 1	10.8059
IL13	Interleukin 13	10.7807
EGFR	Epidermal Growth Factor Receptor	10.7665
HTRA2	HtrA Serine Peptidase 2	10.7604
NDUFS1	NADH:Ubiquinone Oxidoreductase Core Subunit S1	10.757
PCNA	Proliferating Cell Nuclear Antigen	10.7536
SLC25A4	Solute Carrier Family 25 Member 4	10.7535
VIP	Vasoactive Intestinal Peptide	10.7436
GLRX2	Glutaredoxin 2	10.7314
GJA1	Gap Junction Protein Alpha 1	10.7233
PIK3CA	Phosphatidylinositol-4,5-Bisphosphate 3-Kinase Catalytic Subunit Alpha	10.7094
EIF4E	Eukaryotic Translation Initiation Factor 4E	10.7037
BCKDHB	Branched Chain Keto Acid Dehydrogenase E1 Subunit Beta	10.7023
PRKD1	Protein Kinase D1	10.6938
HYOU1	Hypoxia Up-Regulated 1	10.6832
BCL2L1	BCL2 Like 1	10.6769
CEBPB	CCAAT Enhancer Binding Protein Beta	10.6768
CRYAB	Crystallin Alpha B	10.6724
EDNRA	Endothelin Receptor Type A	10.642
DYNLL1	Dynein Light Chain LC8-Type 1	10.6093
HP	Haptoglobin	10.6093
PTEN	Phosphatase And Tensin Homolog	10.5759
RAC1	Rac Family Small GTPase 1	10.5327
CYP11B2	Cytochrome P450 Family 11 Subfamily B Member 2	10.515
STAT1	Signal Transducer And Activator Of Transcription 1	10.5005
MAPK13	Mitogen-Activated Protein Kinase 13	10.4785
PPP1R15A	Protein Phosphatase 1 Regulatory Subunit 15A	10.4685
SIRT6	Sirtuin 6	10.4413
GCLM	Glutamate-Cysteine Ligase Modifier Subunit	10.4297
TECRL	Trans-2,3-Enoyl-CoA Reductase Like	10.4195
CALR	Calreticulin	10.4065
GSS	Glutathione Synthetase	10.3844
NPPB	Natriuretic Peptide B	10.365
EGF	Epidermal Growth Factor	10.3628
FMO2	Flavin Containing Dimethylaniline Monoxygenase 2	10.3529
MAP2K1	Mitogen-Activated Protein Kinase Kinase 1	10.3451
DRD2	Dopamine Receptor D2	10.345
THBD	Thrombomodulin	10.3372
EP300	E1A Binding Protein P300	10.3368
AKR1A1	Aldo-Keto Reductase Family 1 Member A1	10.3282
HSPD1	Heat Shock Protein Family D (Hsp60) Member 1	10.3225
H6PD	Hexose-6-Phosphate Dehydrogenase/Glucose 1-Dehydrogenase	10.3196
MUTYH	MutY DNA Glycosylase	10.2957
NCF1	Neutrophil Cytosolic Factor 1	10.2942
PRKCZ	Protein Kinase C Zeta	10.2925
NLRP3	NLR Family Pyrin Domain Containing 3	10.2615
ASS1	Argininosuccinate Synthase 1	10.2586
PRL	Prolactin	10.2566
TLR2	Toll Like Receptor 2	10.2187
MGST1	Microsomal Glutathione S-Transferase 1	10.2172
NDUFV1	NADH:Ubiquinone Oxidoreductase Core Subunit V1	10.2073
TH	Tyrosine Hydroxylase	10.2032
OGDH	Oxoglutarate Dehydrogenase	10.1877
HSP90B1	Heat Shock Protein 90 Beta Family Member 1	10.1872
NGF	Nerve Growth Factor	10.1733
CASP8	Caspase 8	10.1601
DUSP1	Dual Specificity Phosphatase 1	10.1591
PTK2B	Protein Tyrosine Kinase 2 Beta	10.1341
MT-ND1	Mitochondrially Encoded NADH:Ubiquinone Oxidoreductase Core Subunit 1	10.131
MYH7	Myosin Heavy Chain 7	10.1216
TYR	Tyrosinase	10.1215
PRKG1	Protein Kinase CGMP-Dependent 1	10.0934
SLC6A3	Solute Carrier Family 6 Member 3	10.055
BCS1L	BCS1 Homolog, Ubiquinol-Cytochrome C Reductase Complex Chaperone	10.0459
NFKBIA	NFKB Inhibitor Alpha	10.0302
HTR1A	5-Hydroxytryptamine Receptor 1A	10.0274
PRODH	Proline Dehydrogenase 1	10.0006
BMP6	Bone Morphogenetic Protein 6	9.97062
NTHL1	Nth Like DNA Glycosylase 1	9.94711
PRKCA	Protein Kinase C Alpha	9.84842
CNR1	Cannabinoid Receptor 1	9.84787
NOTCH3	Notch Receptor 3	9.82487
ALDH3A2	Aldehyde Dehydrogenase 3 Family Member A2	9.8119
SDHC	Succinate Dehydrogenase Complex Subunit C	9.7982
PGD	Phosphogluconate Dehydrogenase	9.79687
TXNRD2	Thioredoxin Reductase 2	9.79502
MAPKAPK3	MAPK Activated Protein Kinase 3	9.77353
CFTR	CF Transmembrane Conductance Regulator	9.76728
CRHR2	Corticotropin Releasing Hormone Receptor 2	9.76556
HFE	Homeostatic Iron Regulator	9.7549
UCP1	Uncoupling Protein 1	9.75333
SCARA3	Scavenger Receptor Class A Member 3	9.73745
PRORP	Protein Only RNase P Catalytic Subunit	9.73368
FDXR	Ferredoxin Reductase	9.72988
ISCU	Iron-Sulfur Cluster Assembly Enzyme	9.71965
BCL2L11	BCL2 Like 11	9.71763
FN1	Fibronectin 1	9.70345
CHUK	Component Of Inhibitor Of Nuclear Factor Kappa B Kinase Complex	9.69924
SMPD1	Sphingomyelin Phosphodiesterase 1	9.6908
DDAH1	Dimethylarginine Dimethylaminohydrolase 1	9.67918
PRKAB1	Protein Kinase AMP-Activated Non-Catalytic Subunit Beta 1	9.66879
HSPA9	Heat Shock Protein Family A (Hsp70) Member 9	9.66028
ERCC8	ERCC Excision Repair 8, CSA Ubiquitin Ligase Complex Subunit	9.65256
SCP2	Sterol Carrier Protein 2	9.62591
NDUFB9	NADH:Ubiquinone Oxidoreductase Subunit B9	9.61559
HSPA1B	Heat Shock Protein Family A (Hsp70) Member 1B	9.61064
AKR1B1	Aldo-Keto Reductase Family 1 Member B	9.60828
AKAP9	A-Kinase Anchoring Protein 9	9.59547
CRAT	Carnitine O-Acetyltransferase	9.59148
NDUFA6	NADH:Ubiquinone Oxidoreductase Subunit A6	9.58675
GCDH	Glutaryl-CoA Dehydrogenase	9.56707
CYC1	Cytochrome C1	9.55702
FMO4	Flavin Containing Dimethylaniline Monoxygenase 4	9.53832
EGR1	Early Growth Response 1	9.52798
GLO1	Glyoxalase I	9.52371
UGT1A1	UDP Glucuronosyltransferase Family 1 Member A1	9.52293
TNFRSF1A	TNF Receptor Superfamily Member 1A	9.5202
EEF1A1	Eukaryotic Translation Elongation Factor 1 Alpha 1	9.49918
SCN4B	Sodium Voltage-Gated Channel Beta Subunit 4	9.48172
S100A8	S100 Calcium Binding Protein A8	9.47928
ACP1	Acid Phosphatase 1	9.47885
DLD	Dihydrolipoamide Dehydrogenase	9.47442
ATP13A2	ATPase Cation Transporting 13A2	9.44186
ADM	Adrenomedullin	9.43144
PTPN1	Protein Tyrosine Phosphatase Non-Receptor Type 1	9.41481
BMP2	Bone Morphogenetic Protein 2	9.40974
KCNE2	Potassium Voltage-Gated Channel Subfamily E Regulatory Subunit 2	9.40576
LDHA	Lactate Dehydrogenase A	9.3979
GLUD1	Glutamate Dehydrogenase 1	9.38163
ACO2	Aconitase 2	9.37953
GSK3B	Glycogen Synthase Kinase 3 Beta	9.36171
STK4	Serine/Threonine Kinase 4	9.35158
CBS	Cystathionine Beta-Synthase	9.32514
LPO	Lactoperoxidase	9.3249
THBS1	Thrombospondin 1	9.30608
ATR	ATR Serine/Threonine Kinase	9.2663
NOD2	Nucleotide Binding Oligomerization Domain Containing 2	9.22528
NRF1	Nuclear Respiratory Factor 1	9.22276
ERO1A	Endoplasmic Reticulum Oxidoreductase 1 Alpha	9.20485
INSR	Insulin Receptor	9.20173
BAK1	BCL2 Antagonist/Killer 1	9.19646
ALDH1A1	Aldehyde Dehydrogenase 1 Family Member A1	9.19119
RPS27A	Ribosomal Protein S27a	9.17326
APOB	Apolipoprotein B	9.15845
CDK2	Cyclin Dependent Kinase 2	9.15679
PPIA	Peptidylprolyl Isomerase A	9.15607
ALOX12	Arachidonate 12-Lipoxygenase, 12S Type	9.15255
ACTA1	Actin Alpha 1, Skeletal Muscle	9.13694
AOC3	Amine Oxidase Copper Containing 3	9.13481
SETD2	SET Domain Containing 2, Histone Lysine Methyltransferase	9.13323
TPH1	Tryptophan Hydroxylase 1	9.13159
WARS2	Tryptophanyl TRNA Synthetase 2, Mitochondrial	9.12888
DAXX	Death Domain Associated Protein	9.11659
NOL3	Nucleolar Protein 3	9.11309
GAD2	Glutamate Decarboxylase 2	9.08985
MAPK12	Mitogen-Activated Protein Kinase 12	9.0898
CTSB	Cathepsin B	9.07308
MIEF2	Mitochondrial Elongation Factor 2	9.06404
LOC110973015	NOS3 5' Regulatory Region	9.06197
HRAS	HRas Proto-Oncogene, GTPase	9.05257
CYP3A5	Cytochrome P450 Family 3 Subfamily A Member 5	9.04915
IL2	Interleukin 2	9.01882
CDKN3	Cyclin Dependent Kinase Inhibitor 3	8.99797
PDHA1	Pyruvate Dehydrogenase E1 Subunit Alpha 1	8.99481
NEIL1	Nei Like DNA Glycosylase 1	8.98091
MT-CO3	Mitochondrially Encoded Cytochrome C Oxidase III	8.97931
CYP2C8	Cytochrome P450 Family 2 Subfamily C Member 8	8.97682
MMUT	Methylmalonyl-CoA Mutase	8.96274
CYP27A1	Cytochrome P450 Family 27 Subfamily A Member 1	8.95808
AR	Androgen Receptor	8.95269
FAM120A	Family With Sequence Similarity 120A	8.95246
STUB1	STIP1 Homology And U-Box Containing Protein 1	8.94959
SLC22A5	Solute Carrier Family 22 Member 5	8.94915
ZFAND1	Zinc Finger AN1-Type Containing 1	8.94732
TRPA1	Transient Receptor Potential Cation Channel Subfamily A Member 1	8.92407
PNKD	PNKD Metallo-Beta-Lactamase Domain Containing	8.92089
MDH2	Malate Dehydrogenase 2	8.91391
NDUFS7	NADH:Ubiquinone Oxidoreductase Core Subunit S7	8.90594
CYP2A6	Cytochrome P450 Family 2 Subfamily A Member 6	8.88157
SCN4A	Sodium Voltage-Gated Channel Alpha Subunit 4	8.86863
LRRK2	Leucine Rich Repeat Kinase 2	8.85067
MYC	MYC Proto-Oncogene, BHLH Transcription Factor	8.84109
F5	Coagulation Factor V	8.84096
PAH	Phenylalanine Hydroxylase	8.8375
ALDH9A1	Aldehyde Dehydrogenase 9 Family Member A1	8.83478
PRNP	Prion Protein	8.83266
GSTM3	Glutathione S-Transferase Mu 3	8.82785
CTNNB1	Catenin Beta 1	8.82383
CYP4F2	Cytochrome P450 Family 4 Subfamily F Member 2	8.81507
NDUFS3	NADH:Ubiquinone Oxidoreductase Core Subunit S3	8.8102
NDUFV2	NADH:Ubiquinone Oxidoreductase Core Subunit V2	8.77715
SST	Somatostatin	8.77485
IL17A	Interleukin 17A	8.75898
TIMP1	TIMP Metallopeptidase Inhibitor 1	8.73661
IL1RN	Interleukin 1 Receptor Antagonist	8.73321
CCND1	Cyclin D1	8.70705
COL4A1	Collagen Type IV Alpha 1 Chain	8.69433
PLG	Plasminogen	8.68653
ABCC1	ATP Binding Cassette Subfamily C Member 1	8.68001
MSRB3	Methionine Sulfoxide Reductase B3	8.67952
AHSP	Alpha Hemoglobin Stabilizing Protein	8.67489
BCHE	Butyrylcholinesterase	8.66524
SGK1	Serum/Glucocorticoid Regulated Kinase 1	8.66497
IDH1	Isocitrate Dehydrogenase (NADP(+)) 1	8.66401
SYK	Spleen Associated Tyrosine Kinase	8.65646
LOC111365141	NOS2 5' Regulatory Region	8.65366
ALOX15	Arachidonate 15-Lipoxygenase	8.64944
SESN1	Sestrin 1	8.64874
IKBKB	Inhibitor Of Nuclear Factor Kappa B Kinase Subunit Beta	8.64705
MICB	MHC Class I Polypeptide-Related Sequence B	8.6388
PLA2G6	Phospholipase A2 Group VI	8.62031
GUCY1A1	Guanylate Cyclase 1 Soluble Subunit Alpha 1	8.61298
CYP24A1	Cytochrome P450 Family 24 Subfamily A Member 1	8.60474
DECR1	2,4-Dienoyl-CoA Reductase 1	8.6042
ECHS1	Enoyl-CoA Hydratase, Short Chain 1	8.60031
TRPV1	Transient Receptor Potential Cation Channel Subfamily V Member 1	8.59638
MTR	5-Methyltetrahydrofolate-Homocysteine Methyltransferase	8.5851
ALAD	Aminolevulinate Dehydratase	8.56072
TMEM161A	Transmembrane Protein 161A	8.55998
HSP90AB1	Heat Shock Protein 90 Alpha Family Class B Member 1	8.5581
ATP1A3	ATPase Na+/K+ Transporting Subunit Alpha 3	8.54415
LOX	Lysyl Oxidase	8.52936
PTK2	Protein Tyrosine Kinase 2	8.52776
FANCD2	FA Complementation Group D2	8.51848
ELAVL1	ELAV Like RNA Binding Protein 1	8.50898
NDUFS6	NADH:Ubiquinone Oxidoreductase Subunit S6	8.49245
PPARD	Peroxisome Proliferator Activated Receptor Delta	8.48882
CCL3	C-C Motif Chemokine Ligand 3	8.48671
SERPINA1	Serpin Family A Member 1	8.4756
NDUFB10	NADH:Ubiquinone Oxidoreductase Subunit B10	8.4741
HCRT	Hypocretin Neuropeptide Precursor	8.46683
RAC2	Rac Family Small GTPase 2	8.46653
RAD51	RAD51 Recombinase	8.4665
DHCR24	24-Dehydrocholesterol Reductase	8.46515
FAAH	Fatty Acid Amide Hydrolase	8.4594
MIF	Macrophage Migration Inhibitory Factor	8.45262
UGT1A6	UDP Glucuronosyltransferase Family 1 Member A6	8.4307
GUCY1B1	Guanylate Cyclase 1 Soluble Subunit Beta 1	8.42063
PLA2G4A	Phospholipase A2 Group IVA	8.41618
ELANE	Elastase, Neutrophil Expressed	8.41113
TRAF2	TNF Receptor Associated Factor 2	8.40622
HAO1	Hydroxyacid Oxidase 1	8.40098
CDC42	Cell Division Cycle 42	8.39982
SCO2	Synthesis Of Cytochrome C Oxidase 2	8.39882
GPT	Glutamic--Pyruvic Transaminase	8.39407
CYP19A1	Cytochrome P450 Family 19 Subfamily A Member 1	8.39195
CASP2	Caspase 2	8.38983
MT-ATP6	Mitochondrially Encoded ATP Synthase Membrane Subunit 6	8.38145
PLAT	Plasminogen Activator, Tissue Type	8.37897
MMP1	Matrix Metallopeptidase 1	8.3746
COX4I1	Cytochrome C Oxidase Subunit 4I1	8.36378
CDK5	Cyclin Dependent Kinase 5	8.36126
FASLG	Fas Ligand	8.35717
CLEC4A	C-Type Lectin Domain Family 4 Member A	8.35685
CREBBP	CREB Binding Protein	8.3537
AKR1C1	Aldo-Keto Reductase Family 1 Member C1	8.34969
NDUFA2	NADH:Ubiquinone Oxidoreductase Subunit A2	8.34849
KLF2	KLF Transcription Factor 2	8.33914
C9orf72	C9orf72-SMCR8 Complex Subunit	8.33775
MT-TL1	Mitochondrially Encoded TRNA-Leu (UUA/G) 1	8.33651
FMR1	Fragile X Messenger Ribonucleoprotein 1	8.33604
GFER	Growth Factor, Augmenter Of Liver Regeneration	8.32547
BCL2A1	BCL2 Related Protein A1	8.31239
XRCC1	X-Ray Repair Cross Complementing 1	8.3103
ZFP36	ZFP36 Ring Finger Protein	8.31004
CHCHD4	Coiled-Coil-Helix-Coiled-Coil-Helix Domain Containing 4	8.29485
IL4	Interleukin 4	8.28668
EPX	Eosinophil Peroxidase	8.26695
CYP11A1	Cytochrome P450 Family 11 Subfamily A Member 1	8.23313
PTS	6-Pyruvoyltetrahydropterin Synthase	8.23046
GADD45A	Growth Arrest And DNA Damage Inducible Alpha	8.22585
IGF2BP1	Insulin Like Growth Factor 2 MRNA Binding Protein 1	8.22334
DSPP	Dentin Sialophosphoprotein	8.21966
PIK3R1	Phosphoinositide-3-Kinase Regulatory Subunit 1	8.21817
MT-ND3	Mitochondrially Encoded NADH:Ubiquinone Oxidoreductase Core Subunit 3	8.20892
BAD	BCL2 Associated Agonist Of Cell Death	8.19876
PECAM1	Platelet And Endothelial Cell Adhesion Molecule 1	8.19695
AOX1	Aldehyde Oxidase 1	8.19687
DDX3X	DEAD-Box Helicase 3 X-Linked	8.19679
RPS6KB1	Ribosomal Protein S6 Kinase B1	8.19361
ALDH3A1	Aldehyde Dehydrogenase 3 Family Member A1	8.19148
S100A9	S100 Calcium Binding Protein A9	8.18928
F2	Coagulation Factor II, Thrombin	8.17748
MT-ND4	Mitochondrially Encoded NADH:Ubiquinone Oxidoreductase Core Subunit 4	8.17562
OMA1	OMA1 Zinc Metallopeptidase	8.17295
CASP1	Caspase 1	8.17132
PIEZO1	Piezo Type Mechanosensitive Ion Channel Component 1	8.16941
ACO1	Aconitase 1	8.16246
DUOX2	Dual Oxidase 2	8.16113
VDR	Vitamin D Receptor	8.15556
TG	Thyroglobulin	8.15457
MT-CO2	Mitochondrially Encoded Cytochrome C Oxidase II	8.15253
MAPKAP1	MAPK Associated Protein 1	8.15101
ADH7	Alcohol Dehydrogenase 7 (Class IV), Mu Or Sigma Polypeptide	8.13865
IRS1	Insulin Receptor Substrate 1	8.13794
HBA1	Hemoglobin Subunit Alpha 1	8.12288
NDRG1	N-Myc Downstream Regulated 1	8.11155
CDKN1B	Cyclin Dependent Kinase Inhibitor 1B	8.10065
LCN2	Lipocalin 2	8.0961
CACNA1S	Calcium Voltage-Gated Channel Subunit Alpha1 S	8.08959
CCL11	C-C Motif Chemokine Ligand 11	8.08577
NOA1	Nitric Oxide Associated 1	8.06976
DNM2	Dynamin 2	8.05337
AS3MT	Arsenite Methyltransferase	8.03864
IKBKG	Inhibitor Of Nuclear Factor Kappa B Kinase Regulatory Subunit Gamma	8.02397
CAPN2	Calpain 2	8.0021
MMP3	Matrix Metallopeptidase 3	8.00131
CHEK1	Checkpoint Kinase 1	8.00042
CREB3	CAMP Responsive Element Binding Protein 3	7.99784
RELA	RELA Proto-Oncogene, NF-KB Subunit	7.99673
AGRN	Agrin	7.99585
GSTA4	Glutathione S-Transferase Alpha 4	7.99142
TACR1	Tachykinin Receptor 1	7.98426
NDUFC2	NADH:Ubiquinone Oxidoreductase Subunit C2	7.96955
CTSD	Cathepsin D	7.95881
APOH	Apolipoprotein H	7.94987
CYP17A1	Cytochrome P450 Family 17 Subfamily A Member 1	7.94574
SDHAF1	Succinate Dehydrogenase Complex Assembly Factor 1	7.93356
SLC18A3	Solute Carrier Family 18 Member A3	7.92953
GLUL	Glutamate-Ammonia Ligase	7.92779
ACOX2	Acyl-CoA Oxidase 2	7.92619
GSTM2	Glutathione S-Transferase Mu 2	7.91162
MLYCD	Malonyl-CoA Decarboxylase	7.91009
ALKBH1	AlkB Homolog 1, Histone H2A Dioxygenase	7.90956
RARA	Retinoic Acid Receptor Alpha	7.90954
EIF2B5	Eukaryotic Translation Initiation Factor 2B Subunit Epsilon	7.90799
GPX8	Glutathione Peroxidase 8 (Putative)	7.90206
DSP	Desmoplakin	7.90159
CAMK2G	Calcium/Calmodulin Dependent Protein Kinase II Gamma	7.88303
HTT	Huntingtin	7.88193
MIR21	MicroRNA 21	7.87696
TRAF6	TNF Receptor Associated Factor 6	7.87594
NTRK2	Neurotrophic Receptor Tyrosine Kinase 2	7.8756
LTF	Lactotransferrin	7.86736
IL1R1	Interleukin 1 Receptor Type 1	7.86597
EIF4EBP1	Eukaryotic Translation Initiation Factor 4E Binding Protein 1	7.85913
PPOX	Protoporphyrinogen Oxidase	7.85179
ADRB1	Adrenoceptor Beta 1	7.84488
SMAD3	SMAD Family Member 3	7.84347
ITGB1	Integrin Subunit Beta 1	7.83528
DUSP19	Dual Specificity Phosphatase 19	7.81515
CD40	CD40 Molecule	7.81202
EIF2AK4	Eukaryotic Translation Initiation Factor 2 Alpha Kinase 4	7.80489
CRYAA	Crystallin Alpha A	7.78813
TNFRSF1B	TNF Receptor Superfamily Member 1B	7.7788
GRIA1	Glutamate Ionotropic Receptor AMPA Type Subunit 1	7.77609
PDIA2	Protein Disulfide Isomerase Family A Member 2	7.77017
GRIN2B	Glutamate Ionotropic Receptor NMDA Type Subunit 2B	7.76415
PLA2G2A	Phospholipase A2 Group IIA	7.75478
SCARB1	Scavenger Receptor Class B Member 1	7.75422
EPHX2	Epoxide Hydrolase 2	7.74601
MUC1	Mucin 1, Cell Surface Associated	7.74486
IDO1	Indoleamine 2,3-Dioxygenase 1	7.74051
NDUFAF2	NADH:Ubiquinone Oxidoreductase Complex Assembly Factor 2	7.73025
ABCA1	ATP Binding Cassette Subfamily A Member 1	7.72956
ERCC6	ERCC Excision Repair 6, Chromatin Remodeling Factor	7.72131
KLK3	Kallikrein Related Peptidase 3	7.71951
DMD	Dystrophin	7.71519
NAMPT	Nicotinamide Phosphoribosyltransferase	7.7112
LIAS	Lipoic Acid Synthetase	7.70707
TAC1	Tachykinin Precursor 1	7.70578
ACHE	Acetylcholinesterase (Cartwright Blood Group)	7.70054
CASP4	Caspase 4	7.70011
PLAU	Plasminogen Activator, Urokinase	7.69971
F3	Coagulation Factor III, Tissue Factor	7.6861
E2F1	E2F Transcription Factor 1	7.68471
NDUFAF1	NADH:Ubiquinone Oxidoreductase Complex Assembly Factor 1	7.67739
PXN	Paxillin	7.67478
RPS6KA4	Ribosomal Protein S6 Kinase A4	7.66857
PVALB	Parvalbumin	7.66433
GSTA2	Glutathione S-Transferase Alpha 2	7.65288
KCNMA1	Potassium Calcium-Activated Channel Subfamily M Alpha 1	7.63961
NPM1	Nucleophosmin 1	7.63671
TRPV4	Transient Receptor Potential Cation Channel Subfamily V Member 4	7.62912
ATP5MK	ATP Synthase Membrane Subunit K	7.62
F8	Coagulation Factor VIII	7.61784
CYP4A11	Cytochrome P450 Family 4 Subfamily A Member 11	7.61068
SLC4A1	Solute Carrier Family 4 Member 1 (Diego Blood Group)	7.60225
SNAP25	Synaptosome Associated Protein 25	7.59783
GPX2	Glutathione Peroxidase 2	7.59588
ITPR1	Inositol 1,4,5-Trisphosphate Receptor Type 1	7.56712
PRKCG	Protein Kinase C Gamma	7.55664
ASPH	Aspartate Beta-Hydroxylase	7.55352
TREM2	Triggering Receptor Expressed On Myeloid Cells 2	7.5502
GSTO1	Glutathione S-Transferase Omega 1	7.54813
MAPK8IP1	Mitogen-Activated Protein Kinase 8 Interacting Protein 1	7.54568
PPIF	Peptidylprolyl Isomerase F	7.54203
PTH	Parathyroid Hormone	7.53803
SERPINF1	Serpin Family F Member 1	7.53661
CCN2	Cellular Communication Network Factor 2	7.53362
DNM1L	Dynamin 1 Like	7.53362
JUNB	JunB Proto-Oncogene, AP-1 Transcription Factor Subunit	7.53149
ALKBH2	AlkB Homolog 2, Alpha-Ketoglutarate Dependent Dioxygenase	7.52605
TP53INP1	Tumor Protein P53 Inducible Nuclear Protein 1	7.51728
APAF1	Apoptotic Peptidase Activating Factor 1	7.5146
HDAC2	Histone Deacetylase 2	7.5137
CPT1B	Carnitine Palmitoyltransferase 1B	7.49574
BDKRB2	Bradykinin Receptor B2	7.49485
ACAA1	Acetyl-CoA Acyltransferase 1	7.48898
SLC8A1	Solute Carrier Family 8 Member A1	7.48889
CDK4	Cyclin Dependent Kinase 4	7.48763
CHCHD10	Coiled-Coil-Helix-Coiled-Coil-Helix Domain Containing 10	7.48718
ITGB2	Integrin Subunit Beta 2	7.48405
SLC1A3	Solute Carrier Family 1 Member 3	7.47882
NDUFA9	NADH:Ubiquinone Oxidoreductase Subunit A9	7.47171
RXRA	Retinoid X Receptor Alpha	7.46883
EIF4G1	Eukaryotic Translation Initiation Factor 4 Gamma 1	7.46357
ITGAM	Integrin Subunit Alpha M	7.46273
VDAC1	Voltage Dependent Anion Channel 1	7.46054
SLC17A5	Solute Carrier Family 17 Member 5	7.45811
FOXO4	Forkhead Box O4	7.45722
IGF1R	Insulin Like Growth Factor 1 Receptor	7.45638
MAP2K2	Mitogen-Activated Protein Kinase Kinase 2	7.45568
AHR	Aryl Hydrocarbon Receptor	7.45207
NDUFA8	NADH:Ubiquinone Oxidoreductase Subunit A8	7.4511
GDF15	Growth Differentiation Factor 15	7.4482
PML	PML Nuclear Body Scaffold	7.44708
YARS2	Tyrosyl-TRNA Synthetase 2	7.44673
DBH	Dopamine Beta-Hydroxylase	7.44672
MANF	Mesencephalic Astrocyte Derived Neurotrophic Factor	7.43854
CASP7	Caspase 7	7.43054
RETN	Resistin	7.42651
CXCL1	C-X-C Motif Chemokine Ligand 1	7.42218
CYP2J2	Cytochrome P450 Family 2 Subfamily J Member 2	7.40388
CUL3	Cullin 3	7.40047
S100B	S100 Calcium Binding Protein B	7.39196
GLA	Galactosidase Alpha	7.38971
OPRM1	Opioid Receptor Mu 1	7.38912
RAF1	Raf-1 Proto-Oncogene, Serine/Threonine Kinase	7.3891
NOTCH1	Notch Receptor 1	7.38724
FLT1	Fms Related Receptor Tyrosine Kinase 1	7.37184
RPA1	Replication Protein A1	7.37172
COX6B1	Cytochrome C Oxidase Subunit 6B1	7.36916
DNMT1	DNA Methyltransferase 1	7.36319
KCNJ2	Potassium Inwardly Rectifying Channel Subfamily J Member 2	7.36102
DYRK3	Dual Specificity Tyrosine Phosphorylation Regulated Kinase 3	7.36015
ADCY5	Adenylate Cyclase 5	7.33914
CAPN3	Calpain 3	7.32653
NR2C2	Nuclear Receptor Subfamily 2 Group C Member 2	7.30692
KRAS	KRAS Proto-Oncogene, GTPase	7.3061
COA8	Cytochrome C Oxidase Assembly Factor 8	7.30354
STK24	Serine/Threonine Kinase 24	7.30276
MAP3K7	Mitogen-Activated Protein Kinase Kinase Kinase 7	7.28963
CYP3A7	Cytochrome P450 Family 3 Subfamily A Member 7	7.26878
GRB2	Growth Factor Receptor Bound Protein 2	7.26691
LDLR	Low Density Lipoprotein Receptor	7.26363
EPHA3	EPH Receptor A3	7.263
CIRBP	Cold Inducible RNA Binding Protein	7.25929
MSR1	Macrophage Scavenger Receptor 1	7.25772
RB1	RB Transcriptional Corepressor 1	7.24544
NDUFA1	NADH:Ubiquinone Oxidoreductase Subunit A1	7.23988
ABCB1	ATP Binding Cassette Subfamily B Member 1	7.23661
CCL5	C-C Motif Chemokine Ligand 5	7.2334
FTO	FTO Alpha-Ketoglutarate Dependent Dioxygenase	7.23007
GUCY1A2	Guanylate Cyclase 1 Soluble Subunit Alpha 2	7.22959
ADRB3	Adrenoceptor Beta 3	7.21783
MAP3K1	Mitogen-Activated Protein Kinase Kinase Kinase 1	7.21495
ODC1	Ornithine Decarboxylase 1	7.21045
TFRC	Transferrin Receptor	7.20326
ATXN2L	Ataxin 2 Like	7.20191
AMBP	Alpha-1-Microglobulin/Bikunin Precursor	7.1964
NDUFA10	NADH:Ubiquinone Oxidoreductase Subunit A10	7.1839
QDPR	Quinoid Dihydropteridine Reductase	7.17786
TJP1	Tight Junction Protein 1	7.17597
HMGCL	3-Hydroxy-3-Methylglutaryl-CoA Lyase	7.17269
ENDOG	Endonuclease G	7.17133
HMGCR	3-Hydroxy-3-Methylglutaryl-CoA Reductase	7.16629
XIAP	X-Linked Inhibitor Of Apoptosis	7.16394
CHCHD2	Coiled-Coil-Helix-Coiled-Coil-Helix Domain Containing 2	7.15695
FGF2	Fibroblast Growth Factor 2	7.14363
ELN	Elastin	7.13293
CPOX	Coproporphyrinogen Oxidase	7.12514
AKR1C3	Aldo-Keto Reductase Family 1 Member C3	7.12249
CD40LG	CD40 Ligand	7.11346
PTPN11	Protein Tyrosine Phosphatase Non-Receptor Type 11	7.10891
MT-ND5	Mitochondrially Encoded NADH:Ubiquinone Oxidoreductase Core Subunit 5	7.10581
PLCG1	Phospholipase C Gamma 1	7.1014
UBC	Ubiquitin C	7.0988
ATP5F1E	ATP Synthase F1 Subunit Epsilon	7.0957
MBL2	Mannose Binding Lectin 2	7.08679
DNAH8	Dynein Axonemal Heavy Chain 8	7.08166
PC	Pyruvate Carboxylase	7.08101
CYB5R3	Cytochrome B5 Reductase 3	7.07767
FGF1	Fibroblast Growth Factor 1	7.07407
MT-ND2	Mitochondrially Encoded NADH:Ubiquinone Oxidoreductase Core Subunit 2	7.07384
BAG3	BAG Cochaperone 3	7.07374
PTPN3	Protein Tyrosine Phosphatase Non-Receptor Type 3	7.07321
HDAC1	Histone Deacetylase 1	7.07306
TNFSF10	TNF Superfamily Member 10	7.06372
SMAD2	SMAD Family Member 2	7.0631
TYMP	Thymidine Phosphorylase	7.06189
RCAN1	Regulator Of Calcineurin 1	7.06024
BACE1	Beta-Secretase 1	7.05359
PDIA3	Protein Disulfide Isomerase Family A Member 3	7.04711
MFN2	Mitofusin 2	7.03657
PDLIM4	PDZ And LIM Domain 4	7.03597
UCN2	Urocortin 2	7.02963
RPTOR	Regulatory Associated Protein Of MTOR Complex 1	7.02864
PARG	Poly(ADP-Ribose) Glycohydrolase	7.00559
FBXL4	F-Box And Leucine Rich Repeat Protein 4	6.99931
MIR34A	MicroRNA 34a	6.99749
DAPK1	Death Associated Protein Kinase 1	6.98216
VIM	Vimentin	6.97629
PRKD2	Protein Kinase D2	6.97387
CREB3L1	CAMP Responsive Element Binding Protein 3 Like 1	6.96978
RNASE3	Ribonuclease A Family Member 3	6.96569
SLC2A4	Solute Carrier Family 2 Member 4	6.96541
PRKDC	Protein Kinase, DNA-Activated, Catalytic Subunit	6.96175
SCD	Stearoyl-CoA Desaturase	6.96164
BACH1	BTB Domain And CNC Homolog 1	6.95958
UCN	Urocortin	6.95408
SIGMAR1	Sigma Non-Opioid Intracellular Receptor 1	6.95404
ACE2	Angiotensin Converting Enzyme 2	6.94266
GFAP	Glial Fibrillary Acidic Protein	6.94191
OPA1	OPA1 Mitochondrial Dynamin Like GTPase	6.93862
GBA1	Glucosylceramidase Beta 1	6.93573
MCL1	MCL1 Apoptosis Regulator, BCL2 Family Member	6.9268
CSF1	Colony Stimulating Factor 1	6.92457
FH	Fumarate Hydratase	6.91687
CXCR4	C-X-C Motif Chemokine Receptor 4	6.9157
HRH2	Histamine Receptor H2	6.90696
PRKCQ	Protein Kinase C Theta	6.90649
BRF2	BRF2 RNA Polymerase III Transcription Initiation Factor Subunit	6.89767
IRF1	Interferon Regulatory Factor 1	6.8895
LBR	Lamin B Receptor	6.88554
NR1H2	Nuclear Receptor Subfamily 1 Group H Member 2	6.88228
CYB5A	Cytochrome B5 Type A	6.87587
NDUFB8	NADH:Ubiquinone Oxidoreductase Subunit B8	6.87558
SLC7A1	Solute Carrier Family 7 Member 1	6.87288
ADAMTS13	ADAM Metallopeptidase With Thrombospondin Type 1 Motif 13	6.86812
VASP	Vasodilator Stimulated Phosphoprotein	6.86578
NUDT5	Nudix Hydrolase 5	6.86343
ADCYAP1R1	ADCYAP Receptor Type I	6.86266
UQCRQ	Ubiquinol-Cytochrome C Reductase Complex III Subunit VII	6.84716
MIR126	MicroRNA 126	6.84427
LTA	Lymphotoxin Alpha	6.83703
OGFOD1	2-Oxoglutarate And Iron Dependent Oxygenase Domain Containing 1	6.82647
SLC1A1	Solute Carrier Family 1 Member 1	6.81835
GPX5	Glutathione Peroxidase 5	6.81184
VKORC1L1	Vitamin K Epoxide Reductase Complex Subunit 1 Like 1	6.81148
PPIG	Peptidylprolyl Isomerase G	6.80681
DLG4	Discs Large MAGUK Scaffold Protein 4	6.80397
SLC25A1	Solute Carrier Family 25 Member 1	6.80308
IL12B	Interleukin 12B	6.80269
HLA-B	Major Histocompatibility Complex, Class I, B	6.80067
SPP1	Secreted Phosphoprotein 1	6.80049
BIRC5	Baculoviral IAP Repeat Containing 5	6.79189
IL3	Interleukin 3	6.78702
HBEGF	Heparin Binding EGF Like Growth Factor	6.7841
ACTB	Actin Beta	6.77934
IMMT	Inner Membrane Mitochondrial Protein	6.77831
NDUFA12	NADH:Ubiquinone Oxidoreductase Subunit A12	6.77781
ROCK1	Rho Associated Coiled-Coil Containing Protein Kinase 1	6.76907
MTRR	5-Methyltetrahydrofolate-Homocysteine Methyltransferase Reductase	6.76749
RUNX2	RUNX Family Transcription Factor 2	6.74622
MGST2	Microsomal Glutathione S-Transferase 2	6.74553
RET	Ret Proto-Oncogene	6.73739
ANGPT1	Angiopoietin 1	6.73498
SYNPO2	Synaptopodin 2	6.73364
FYN	FYN Proto-Oncogene, Src Family Tyrosine Kinase	6.73214
LPL	Lipoprotein Lipase	6.72705
GSTM4	Glutathione S-Transferase Mu 4	6.72344
TEK	TEK Receptor Tyrosine Kinase	6.72334
REST	RE1 Silencing Transcription Factor	6.71969
ZC3H12A	Zinc Finger CCCH-Type Containing 12A	6.71882
ALPP	Alkaline Phosphatase, Placental	6.71316
LYN	LYN Proto-Oncogene, Src Family Tyrosine Kinase	6.71134
SLC7A11	Solute Carrier Family 7 Member 11	6.70961
GSTM5	Glutathione S-Transferase Mu 5	6.70938
FTH1	Ferritin Heavy Chain 1	6.70898
IREB2	Iron Responsive Element Binding Protein 2	6.70895
CD44	CD44 Molecule (Indian Blood Group)	6.70757
ADH4	Alcohol Dehydrogenase 4 (Class II), Pi Polypeptide	6.70563
ADH1C	Alcohol Dehydrogenase 1C (Class I), Gamma Polypeptide	6.7052
PPP1R12A	Protein Phosphatase 1 Regulatory Subunit 12A	6.70009
AIFM2	Apoptosis Inducing Factor Mitochondria Associated 2	6.69324
SLC5A7	Solute Carrier Family 5 Member 7	6.68575
SELL	Selectin L	6.68254
STK39	Serine/Threonine Kinase 39	6.68224
ARNT	Aryl Hydrocarbon Receptor Nuclear Translocator	6.67809
OXA1L	OXA1L Mitochondrial Inner Membrane Protein	6.67584
TLR9	Toll Like Receptor 9	6.66806
ATG9B	Autophagy Related 9B	6.66688
ANGPT2	Angiopoietin 2	6.66615
PRKCH	Protein Kinase C Eta	6.66082
DLAT	Dihydrolipoamide S-Acetyltransferase	6.65775
TALDO1	Transaldolase 1	6.65635
CCK	Cholecystokinin	6.63326
NEIL2	Nei Like DNA Glycosylase 2	6.63109
EDNRB	Endothelin Receptor Type B	6.60947
CACNA1A	Calcium Voltage-Gated Channel Subunit Alpha1 A	6.60621
PDE4A	Phosphodiesterase 4A	6.60148
RORA	RAR Related Orphan Receptor A	6.60016
GAL	Galanin And GMAP Prepropeptide	6.59533
FTL	Ferritin Light Chain	6.58645
MYLK	Myosin Light Chain Kinase	6.58632
MICA	MHC Class I Polypeptide-Related Sequence A	6.57185
MAF	MAF BZIP Transcription Factor	6.57167
VCL	Vinculin	6.56746
IL15	Interleukin 15	6.56269
FOSL1	FOS Like 1, AP-1 Transcription Factor Subunit	6.56268
LPA	Lipoprotein(A)	6.56102
SORD	Sorbitol Dehydrogenase	6.55988
FGF7	Fibroblast Growth Factor 7	6.55701
CHRNE	Cholinergic Receptor Nicotinic Epsilon Subunit	6.55395
MUC5AC	Mucin 5AC, Oligomeric Mucus/Gel-Forming	6.54951
H2AX	H2A.X Variant Histone	6.54165
GPX6	Glutathione Peroxidase 6	6.53973
PPP5C	Protein Phosphatase 5 Catalytic Subunit	6.53456
PLAUR	Plasminogen Activator, Urokinase Receptor	6.53325
CHGA	Chromogranin A	6.52781
TPM1	Tropomyosin 1	6.52163
CSF2	Colony Stimulating Factor 2	6.51054
ADORA2A	Adenosine A2a Receptor	6.50142
ANXA2	Annexin A2	6.50137
MAPKAPK5	MAPK Activated Protein Kinase 5	6.49919
TNFAIP8L1	TNF Alpha Induced Protein 8 Like 1	6.49748
TNFSF11	TNF Superfamily Member 11	6.49015
PABPC1	Poly(A) Binding Protein Cytoplasmic 1	6.48801
TBXA2R	Thromboxane A2 Receptor	6.48207
EPAS1	Endothelial PAS Domain Protein 1	6.47968
S1PR1	Sphingosine-1-Phosphate Receptor 1	6.47948
KCNQ1OT1	KCNQ1 Opposite Strand/Antisense Transcript 1	6.47566
CDK1	Cyclin Dependent Kinase 1	6.45431
CYP20A1	Cytochrome P450 Family 20 Subfamily A Member 1	6.45398
CDH5	Cadherin 5	6.44328
SUCLA2	Succinate-CoA Ligase ADP-Forming Subunit Beta	6.44286
DNAH5	Dynein Axonemal Heavy Chain 5	6.43084
ACAA2	Acetyl-CoA Acyltransferase 2	6.42483
FBN1	Fibrillin 1	6.41822
MICAL1	Microtubule Associated Monooxygenase, Calponin And LIM Domain Containing 1	6.40955
TGM2	Transglutaminase 2	6.40737
UCN3	Urocortin 3	6.40516
ADA	Adenosine Deaminase	6.39811
PON3	Paraoxonase 3	6.39319
ALOX5AP	Arachidonate 5-Lipoxygenase Activating Protein	6.39282
GSTZ1	Glutathione S-Transferase Zeta 1	6.39222
ANG	Angiogenin	6.38181
TSPO	Translocator Protein	6.38114
HBA2	Hemoglobin Subunit Alpha 2	6.37996
ATF6B	Activating Transcription Factor 6 Beta	6.37168
HSPA14	Heat Shock Protein Family A (Hsp70) Member 14	6.36336
SLPI	Secretory Leukocyte Peptidase Inhibitor	6.36068
COX6A2	Cytochrome C Oxidase Subunit 6A2	6.35837
TGFB2	Transforming Growth Factor Beta 2	6.34903
PDYN	Prodynorphin	6.34147
WRN	WRN RecQ Like Helicase	6.33757
HPRT1	Hypoxanthine Phosphoribosyltransferase 1	6.33732
AQP1	Aquaporin 1 (Colton Blood Group)	6.33582
TNFRSF11B	TNF Receptor Superfamily Member 11b	6.33346
KCNJ11	Potassium Inwardly Rectifying Channel Subfamily J Member 11	6.33117
FLAD1	Flavin Adenine Dinucleotide Synthetase 1	6.32465
CDC25C	Cell Division Cycle 25C	6.32191
KL	Klotho	6.3166
NDUFAF3	NADH:Ubiquinone Oxidoreductase Complex Assembly Factor 3	6.31638
DLST	Dihydrolipoamide S-Succinyltransferase	6.31522
IFNA1	Interferon Alpha 1	6.31107
TLR3	Toll Like Receptor 3	6.29466
RBM4	RNA Binding Motif Protein 4	6.29367
RANBP2	RAN Binding Protein 2	6.29118
IL11	Interleukin 11	6.29022
TIAL1	TIA1 Cytotoxic Granule Associated RNA Binding Protein Like 1	6.28976
MIR146A	MicroRNA 146a	6.28345
PENK	Proenkephalin	6.28015
ADCY10	Adenylate Cyclase 10	6.27537
TFAM	Transcription Factor A, Mitochondrial	6.27458
GH1	Growth Hormone 1	6.27433
AMY1A	Amylase Alpha 1A	6.27408
SELENOK	Selenoprotein K	6.26645
KLF4	KLF Transcription Factor 4	6.26243
HSPG2	Heparan Sulfate Proteoglycan 2	6.25182
MMP13	Matrix Metallopeptidase 13	6.25161
SENP3	SUMO Specific Peptidase 3	6.24055
H2AC18	H2A Clustered Histone 18	6.23514
EEF2	Eukaryotic Translation Elongation Factor 2	6.2264
GSTO2	Glutathione S-Transferase Omega 2	6.22508
YBX1	Y-Box Binding Protein 1	6.22198
BCKDHA	Branched Chain Keto Acid Dehydrogenase E1 Subunit Alpha	6.21834
QRICH1	Glutamine Rich 1	6.20884
HDAC9	Histone Deacetylase 9	6.20843
TTR	Transthyretin	6.20823
KMT2B	Lysine Methyltransferase 2B	6.20637
LGALS3	Galectin 3	6.19032
PDK1	Pyruvate Dehydrogenase Kinase 1	6.17824
CXCL10	C-X-C Motif Chemokine Ligand 10	6.17795
TP73	Tumor Protein P73	6.17474
MYO9A	Myosin IXA	6.17053
GYS1	Glycogen Synthase 1	6.16986
CDK6	Cyclin Dependent Kinase 6	6.16761
NDOR1	NADPH Dependent Diflavin Oxidoreductase 1	6.16548
TRIB3	Tribbles Pseudokinase 3	6.16543
ELK1	ETS Transcription Factor ELK1	6.16158
ALDH3B1	Aldehyde Dehydrogenase 3 Family Member B1	6.16105
NFU1	NFU1 Iron-Sulfur Cluster Scaffold	6.1603
PAK1	P21 (RAC1) Activated Kinase 1	6.15989
ACAD11	Acyl-CoA Dehydrogenase Family Member 11	6.15804
ITGAL	Integrin Subunit Alpha L	6.15186
ESR2	Estrogen Receptor 2	6.14538
GH-LCR	Growth Hormone Locus Control Region	6.14382
CYP7A1	Cytochrome P450 Family 7 Subfamily A Member 1	6.13633
ADH1B	Alcohol Dehydrogenase 1B (Class I), Beta Polypeptide	6.13248
MT-ND6	Mitochondrially Encoded NADH:Ubiquinone Oxidoreductase Core Subunit 6	6.1306
CYP46A1	Cytochrome P450 Family 46 Subfamily A Member 1	6.12814
HGF	Hepatocyte Growth Factor	6.12279
GDNF	Glial Cell Derived Neurotrophic Factor	6.12046
ENO2	Enolase 2	6.11702
FLG	Filaggrin	6.10653
JUND	JunD Proto-Oncogene, AP-1 Transcription Factor Subunit	6.10268
HSPA13	Heat Shock Protein Family A (Hsp70) Member 13	6.10214
DES	Desmin	6.09811
PIK3CB	Phosphatidylinositol-4,5-Bisphosphate 3-Kinase Catalytic Subunit Beta	6.09514
BECN1	Beclin 1	6.089
PSEN2	Presenilin 2	6.08722
LIPE	Lipase E, Hormone Sensitive Type	6.07286
IAPP	Islet Amyloid Polypeptide	6.06392
UGT1A10	UDP Glucuronosyltransferase Family 1 Member A10	6.06147
GRIN1	Glutamate Ionotropic Receptor NMDA Type Subunit 1	6.06136
UQCC3	Ubiquinol-Cytochrome C Reductase Complex Assembly Factor 3	6.05735
CYP11B1	Cytochrome P450 Family 11 Subfamily B Member 1	6.05647
BBC3	BCL2 Binding Component 3	6.05349
NAT2	N-Acetyltransferase 2	6.05049
CREB3L2	CAMP Responsive Element Binding Protein 3 Like 2	6.04841
BRAF	B-Raf Proto-Oncogene, Serine/Threonine Kinase	6.03661
PSIP1	PC4 And SFRS1 Interacting Protein 1	6.03053
SELENOP	Selenoprotein P	6.0233
ADH1A	Alcohol Dehydrogenase 1A (Class I), Alpha Polypeptide	6.02281
FOXL2	Forkhead Box L2	6.02217
SLC1A2	Solute Carrier Family 1 Member 2	6.01394
BNIP3	BCL2 Interacting Protein 3	6.01299
PRKRA	Protein Activator Of Interferon Induced Protein Kinase EIF2AK2	6.0091
KBTBD13	Kelch Repeat And BTB Domain Containing 13	6.00685
TRAP1	TNF Receptor Associated Protein 1	5.99888
ECE1	Endothelin Converting Enzyme 1	5.9972
HTR2C	5-Hydroxytryptamine Receptor 2C	5.99569
IGFBP1	Insulin Like Growth Factor Binding Protein 1	5.99403
TRMU	TRNA Mitochondrial 2-Thiouridylase	5.99112
PTPN6	Protein Tyrosine Phosphatase Non-Receptor Type 6	5.98507
COL2A1	Collagen Type II Alpha 1 Chain	5.98436
ITGA2	Integrin Subunit Alpha 2	5.97569
IL1RAPL2	Interleukin 1 Receptor Accessory Protein Like 2	5.97481
GPD1	Glycerol-3-Phosphate Dehydrogenase 1	5.97005
CCNA2	Cyclin A2	5.9698
GAREM2	GRB2 Associated Regulator Of MAPK1 Subtype 2	5.9688
VNN1	Vanin 1	5.9652
SMG1	SMG1 Nonsense Mediated MRNA Decay Associated PI3K Related Kinase	5.95517
CFLAR	CASP8 And FADD Like Apoptosis Regulator	5.9536
ACADSB	Acyl-CoA Dehydrogenase Short/Branched Chain	5.94253
ENC1	Ectodermal-Neural Cortex 1	5.94146
UGT1A9	UDP Glucuronosyltransferase Family 1 Member A9	5.9375
COX8A	Cytochrome C Oxidase Subunit 8A	5.92997
UGT1A	UDP Glucuronosyltransferase Family 1 Member A Complex Locus	5.92995
DPP4	Dipeptidyl Peptidase 4	5.9235
CYP21A2	Cytochrome P450 Family 21 Subfamily A Member 2	5.92084
NOX5	NADPH Oxidase 5	5.91639
SYVN1	Synoviolin 1	5.90936
NUPR1	Nuclear Protein 1, Transcriptional Regulator	5.90722
SFPQ	Splicing Factor Proline And Glutamine Rich	5.89258
PPP1R15B	Protein Phosphatase 1 Regulatory Subunit 15B	5.88849
ACACA	Acetyl-CoA Carboxylase Alpha	5.88481
TRIM21	Tripartite Motif Containing 21	5.8784
UQCRB	Ubiquinol-Cytochrome C Reductase Binding Protein	5.87556
CHKA	Choline Kinase Alpha	5.87535
SPR	Sepiapterin Reductase	5.87524
ATG4D	Autophagy Related 4D Cysteine Peptidase	5.87225
CCL4	C-C Motif Chemokine Ligand 4	5.87152
CTH	Cystathionine Gamma-Lyase	5.85897
SCO1	Synthesis Of Cytochrome C Oxidase 1	5.857
PAGE4	PAGE Family Member 4	5.85683
FUS	FUS RNA Binding Protein	5.84799
UBB	Ubiquitin B	5.84476
TOR1A	Torsin Family 1 Member A	5.84248
PLCG2	Phospholipase C Gamma 2	5.82898
AOC1	Amine Oxidase Copper Containing 1	5.8283
DRD1	Dopamine Receptor D1	5.82288
TOP2A	DNA Topoisomerase II Alpha	5.81901
PXDN	Peroxidasin	5.81835
LCAT	Lecithin-Cholesterol Acyltransferase	5.81689
MYH6	Myosin Heavy Chain 6	5.81088
AKT2	AKT Serine/Threonine Kinase 2	5.80965
BACH2	BTB Domain And CNC Homolog 2	5.79596
ATP1A2	ATPase Na+/K+ Transporting Subunit Alpha 2	5.79397
APOA2	Apolipoprotein A2	5.78502
MYCN	MYCN Proto-Oncogene, BHLH Transcription Factor	5.77959
PDGFB	Platelet Derived Growth Factor Subunit B	5.77526
UCHL1	Ubiquitin C-Terminal Hydrolase L1	5.77373
NDUFA13	NADH:Ubiquinone Oxidoreductase Subunit A13	5.77155
NDUFAB1	NADH:Ubiquinone Oxidoreductase Subunit AB1	5.77023
NR1I2	Nuclear Receptor Subfamily 1 Group I Member 2	5.76765
AGK	Acylglycerol Kinase	5.76479
ROCK2	Rho Associated Coiled-Coil Containing Protein Kinase 2	5.75584
SFTPD	Surfactant Protein D	5.75493
NOS2P2	Nitric Oxide Synthase 2 Pseudogene 2	5.74964
TGIF1	TGFB Induced Factor Homeobox 1	5.74769
GCK	Glucokinase	5.7404
HSD17B6	Hydroxysteroid 17-Beta Dehydrogenase 6	5.74012
AVP	Arginine Vasopressin	5.73853
CHRM2	Cholinergic Receptor Muscarinic 2	5.73834
ABCC2	ATP Binding Cassette Subfamily C Member 2	5.73543
SMPD2	Sphingomyelin Phosphodiesterase 2	5.73231
BMI1	BMI1 Proto-Oncogene, Polycomb Ring Finger	5.73199
KRT5	Keratin 5	5.73041
GCHFR	GTP Cyclohydrolase I Feedback Regulator	5.72564
DUOX1	Dual Oxidase 1	5.72044
STK11	Serine/Threonine Kinase 11	5.717
TRPM4	Transient Receptor Potential Cation Channel Subfamily M Member 4	5.71168
HNF4A	Hepatocyte Nuclear Factor 4 Alpha	5.71027
ACACB	Acetyl-CoA Carboxylase Beta	5.71008
HPX	Hemopexin	5.71
ANKRD2	Ankyrin Repeat Domain 2	5.70689
FASN	Fatty Acid Synthase	5.70605
SURF1	SURF1 Cytochrome C Oxidase Assembly Factor	5.70532
PYCR1	Pyrroline-5-Carboxylate Reductase 1	5.70483
FCER2	Fc Epsilon Receptor II	5.69914
HRH1	Histamine Receptor H1	5.69424
KCNN4	Potassium Calcium-Activated Channel Subfamily N Member 4	5.69212
ERCC2	ERCC Excision Repair 2, TFIIH Core Complex Helicase Subunit	5.69131
GNB3	G Protein Subunit Beta 3	5.6892
VAMP1	Vesicle Associated Membrane Protein 1	5.68849
DDX1	DEAD-Box Helicase 1	5.68793
PHYH	Phytanoyl-CoA 2-Hydroxylase	5.68793
NADK2	NAD Kinase 2, Mitochondrial	5.68156
FOSB	FosB Proto-Oncogene, AP-1 Transcription Factor Subunit	5.68135
POU2F1	POU Class 2 Homeobox 1	5.67088
ME1	Malic Enzyme 1	5.66958
HNMT	Histamine N-Methyltransferase	5.66563
NDUFA11	NADH:Ubiquinone Oxidoreductase Subunit A11	5.6651
PTPA	Protein Phosphatase 2 Phosphatase Activator	5.6642
SOCS3	Suppressor Of Cytokine Signaling 3	5.66234
ENO1	Enolase 1	5.65383
YY1	YY1 Transcription Factor	5.65265
MT1A	Metallothionein 1A	5.6516
RAD50	RAD50 Double Strand Break Repair Protein	5.64242
NDUFA4	NDUFA4 Mitochondrial Complex Associated	5.64234
CYP4F8	Cytochrome P450 Family 4 Subfamily F Member 8	5.63323
MME	Membrane Metalloendopeptidase	5.63097
AKR1C2	Aldo-Keto Reductase Family 1 Member C2	5.62848
TTC19	Tetratricopeptide Repeat Domain 19	5.62832
OGN	Osteoglycin	5.62118
TUBA1B	Tubulin Alpha 1b	5.6169
CD14	CD14 Molecule	5.6113
SRF	Serum Response Factor	5.60829
PNPLA2	Patatin Like Phospholipase Domain Containing 2	5.60791
MET	MET Proto-Oncogene, Receptor Tyrosine Kinase	5.60373
SLC3A2	Solute Carrier Family 3 Member 2	5.59961
CXCL12	C-X-C Motif Chemokine Ligand 12	5.59854
KCNQ2	Potassium Voltage-Gated Channel Subfamily Q Member 2	5.59416
PTAFR	Platelet Activating Factor Receptor	5.58954
PYROXD1	Pyridine Nucleotide-Disulphide Oxidoreductase Domain 1	5.58706
RPS3	Ribosomal Protein S3	5.57955
SLC25A27	Solute Carrier Family 25 Member 27	5.57953
PIN1	Peptidylprolyl Cis/Trans Isomerase, NIMA-Interacting 1	5.57757
CSK	C-Terminal Src Kinase	5.5754
PPP3CA	Protein Phosphatase 3 Catalytic Subunit Alpha	5.57161
ATOX1	Antioxidant 1 Copper Chaperone	5.57024
CXCR2	C-X-C Motif Chemokine Receptor 2	5.56854
HSPA6	Heat Shock Protein Family A (Hsp70) Member 6	5.5671
COX7B	Cytochrome C Oxidase Subunit 7B	5.56679
PKM	Pyruvate Kinase M1/2	5.56476
CHEK2	Checkpoint Kinase 2	5.56474
SERPINA3	Serpin Family A Member 3	5.55842
JAK1	Janus Kinase 1	5.55507
MIR155	MicroRNA 155	5.55298
TKT	Transketolase	5.54657
PNKP	Polynucleotide Kinase 3'-Phosphatase	5.54498
NCF4	Neutrophil Cytosolic Factor 4	5.54301
KHSRP	KH-Type Splicing Regulatory Protein	5.5413
CXCR3	C-X-C Motif Chemokine Receptor 3	5.54082
ATP2A3	ATPase Sarcoplasmic/Endoplasmic Reticulum Ca2+ Transporting 3	5.53948
MAPK7	Mitogen-Activated Protein Kinase 7	5.5381
NME1	NME/NM23 Nucleoside Diphosphate Kinase 1	5.53499
UGT1A4	UDP Glucuronosyltransferase Family 1 Member A4	5.53425
ABCD3	ATP Binding Cassette Subfamily D Member 3	5.53367
BID	BH3 Interacting Domain Death Agonist	5.53362
SPATS2L	Spermatogenesis Associated Serine Rich 2 Like	5.5295
AGTR2	Angiotensin II Receptor Type 2	5.52374
ERCC5	ERCC Excision Repair 5, Endonuclease	5.52076
ARRB1	Arrestin Beta 1	5.51449
KRT18	Keratin 18	5.50848
BGLAP	Bone Gamma-Carboxyglutamate Protein	5.50809
HSF2	Heat Shock Transcription Factor 2	5.50298
PIK3C2A	Phosphatidylinositol-4-Phosphate 3-Kinase Catalytic Subunit Type 2 Alpha	5.50286
MDH1	Malate Dehydrogenase 1	5.5027
MYD88	MYD88 Innate Immune Signal Transduction Adaptor	5.5027
CD80	CD80 Molecule	5.49912
GSTK1	Glutathione S-Transferase Kappa 1	5.49625
NFAT5	Nuclear Factor Of Activated T Cells 5	5.49481
YTHDF2	YTH N6-Methyladenosine RNA Binding Protein 2	5.49446
ITGA4	Integrin Subunit Alpha 4	5.49087
SLC25A3	Solute Carrier Family 25 Member 3	5.48502
COX10	Cytochrome C Oxidase Assembly Factor Heme A:Farnesyltransferase COX10	5.48212
UGT1A3	UDP Glucuronosyltransferase Family 1 Member A3	5.47472
IDH2	Isocitrate Dehydrogenase (NADP(+)) 2	5.4737
CCS	Copper Chaperone For Superoxide Dismutase	5.46214
DNAJC3	DnaJ Heat Shock Protein Family (Hsp40) Member C3	5.46139
PPBP	Pro-Platelet Basic Protein	5.45648
NEB	Nebulin	5.44812
FKBP4	FKBP Prolyl Isomerase 4	5.44588
NDUFB11	NADH:Ubiquinone Oxidoreductase Subunit B11	5.44514
ATP2B4	ATPase Plasma Membrane Ca2+ Transporting 4	5.44477
FKBP1B	FKBP Prolyl Isomerase 1B	5.44233
C5AR1	Complement C5a Receptor 1	5.43931
ABHD12	Abhydrolase Domain Containing 12, Lysophospholipase	5.43857
SERPINB5	Serpin Family B Member 5	5.43633
EZH2	Enhancer Of Zeste 2 Polycomb Repressive Complex 2 Subunit	5.42831
DUSP6	Dual Specificity Phosphatase 6	5.42722
UQCRC2	Ubiquinol-Cytochrome C Reductase Core Protein 2	5.42629
SCGB1A1	Secretoglobin Family 1A Member 1	5.42501
FOXM1	Forkhead Box M1	5.42373
SMOX	Spermine Oxidase	5.41971
LANCL1	LanC Like Glutathione S-Transferase 1	5.41537
DSC2	Desmocollin 2	5.40915
TOP1	DNA Topoisomerase I	5.40787
MTARC1	Mitochondrial Amidoxime Reducing Component 1	5.40543
TNFRSF10B	TNF Receptor Superfamily Member 10b	5.3984
PEX11B	Peroxisomal Biogenesis Factor 11 Beta	5.39682
LRRC56	Leucine Rich Repeat Containing 56	5.39601
CCL20	C-C Motif Chemokine Ligand 20	5.38333
BLVRA	Biliverdin Reductase A	5.38014
SELENOT	Selenoprotein T	5.37941
CXCL16	C-X-C Motif Chemokine Ligand 16	5.37619
GZMB	Granzyme B	5.37479
F2RL1	F2R Like Trypsin Receptor 1	5.3743
ALPL	Alkaline Phosphatase, Biomineralization Associated	5.37408
CAMP	Cathelicidin Antimicrobial Peptide	5.37306
DDRGK1	DDRGK Domain Containing 1	5.36924
HDAC3	Histone Deacetylase 3	5.36922
MT3	Metallothionein 3	5.36913
CAMK1	Calcium/Calmodulin Dependent Protein Kinase I	5.36688
LEPQTL1	Leptin, Serum Levels Of	5.36666
DNAJB1	DnaJ Heat Shock Protein Family (Hsp40) Member B1	5.36398
DCD	Dermcidin	5.36287
ATP5PF	ATP Synthase Peripheral Stalk Subunit F6	5.362
MMP8	Matrix Metallopeptidase 8	5.36048
DBT	Dihydrolipoamide Branched Chain Transacylase E2	5.35968
MTIF2	Mitochondrial Translational Initiation Factor 2	5.35442
IGF2BP2	Insulin Like Growth Factor 2 MRNA Binding Protein 2	5.34959
HSD11B1	Hydroxysteroid 11-Beta Dehydrogenase 1	5.3494
CHRNA4	Cholinergic Receptor Nicotinic Alpha 4 Subunit	5.34185
COQ9	Coenzyme Q9	5.34033
LOXL2	Lysyl Oxidase Like 2	5.33806
COQ2	Coenzyme Q2, Polyprenyltransferase	5.33333
TAT	Tyrosine Aminotransferase	5.32791
KLRK1	Killer Cell Lectin Like Receptor K1	5.32615
PDLIM1	PDZ And LIM Domain 1	5.31537
RRM2B	Ribonucleotide Reductase Regulatory TP53 Inducible Subunit M2B	5.31495
CHI3L1	Chitinase 3 Like 1	5.30895
ST3GAL4	ST3 Beta-Galactoside Alpha-2,3-Sialyltransferase 4	5.30512
SERPINA6	Serpin Family A Member 6	5.30434
HSPB2	Heat Shock Protein Family B (Small) Member 2	5.30178
CASP6	Caspase 6	5.29862
TIGAR	TP53 Induced Glycolysis Regulatory Phosphatase	5.29752
MEF2A	Myocyte Enhancer Factor 2A	5.29263
HIPK1	Homeodomain Interacting Protein Kinase 1	5.29066
UBQLN1	Ubiquilin 1	5.28842
RNF112	Ring Finger Protein 112	5.28832
NGFR	Nerve Growth Factor Receptor	5.28816
UQCC2	Ubiquinol-Cytochrome C Reductase Complex Assembly Factor 2	5.28437
PLK3	Polo Like Kinase 3	5.28367
CYP27B1	Cytochrome P450 Family 27 Subfamily B Member 1	5.28233
F9	Coagulation Factor IX	5.28092
NR4A2	Nuclear Receptor Subfamily 4 Group A Member 2	5.27702
ERBB2	Erb-B2 Receptor Tyrosine Kinase 2	5.27698
ATXN2	Ataxin 2	5.27628
YTHDF1	YTH N6-Methyladenosine RNA Binding Protein 1	5.27622
SMAD4	SMAD Family Member 4	5.27572
KITLG	KIT Ligand	5.26845
NPPC	Natriuretic Peptide C	5.267
PSMC6	Proteasome 26S Subunit, ATPase 6	5.26686
CYB5B	Cytochrome B5 Type B	5.26347
SREBF1	Sterol Regulatory Element Binding Transcription Factor 1	5.25892
PSMA6	Proteasome 20S Subunit Alpha 6	5.25501
CDH1	Cadherin 1	5.25312
GCG	Glucagon	5.25276
XRCC3	X-Ray Repair Cross Complementing 3	5.25121
PEX5	Peroxisomal Biogenesis Factor 5	5.24411
ACSL4	Acyl-CoA Synthetase Long Chain Family Member 4	5.24317
COX14	Cytochrome C Oxidase Assembly Factor COX14	5.24091
SLC4A11	Solute Carrier Family 4 Member 11	5.2406
SETX	Senataxin	5.24007
NAGLU	N-Acetyl-Alpha-Glucosaminidase	5.23508
P2RX7	Purinergic Receptor P2X 7	5.23298
BMP4	Bone Morphogenetic Protein 4	5.23268
MYBPC3	Myosin Binding Protein C3	5.23094
TUBB	Tubulin Beta Class I	5.22705
CANT1	Calcium Activated Nucleotidase 1	5.22622
SERPINC1	Serpin Family C Member 1	5.22568
WFS1	Wolframin ER Transmembrane Glycoprotein	5.2214
PSMA7	Proteasome 20S Subunit Alpha 7	5.2198
CCNO	Cyclin O	5.21632
MPC1	Mitochondrial Pyruvate Carrier 1	5.21498
GJA5	Gap Junction Protein Alpha 5	5.21046
YWHAZ	Tyrosine 3-Monooxygenase/Tryptophan 5-Monooxygenase Activation Protein Zeta	5.2095
SDHAF2	Succinate Dehydrogenase Complex Assembly Factor 2	5.20924
TREX1	Three Prime Repair Exonuclease 1	5.20352
NTS	Neurotensin	5.20034
NR1H4	Nuclear Receptor Subfamily 1 Group H Member 4	5.19963
MAX	MYC Associated Factor X	5.19571
CAPN1	Calpain 1	5.19388
SFTPB	Surfactant Protein B	5.19377
FECH	Ferrochelatase	5.18514
SELENOS	Selenoprotein S	5.17636
MIR29B1	MicroRNA 29b-1	5.1751
RBX1	Ring-Box 1	5.17187
NPC1	NPC Intracellular Cholesterol Transporter 1	5.16989
HSPB8	Heat Shock Protein Family B (Small) Member 8	5.16889
IL1RAP	Interleukin 1 Receptor Accessory Protein	5.16505
LCK	LCK Proto-Oncogene, Src Family Tyrosine Kinase	5.16483
TRAF3	TNF Receptor Associated Factor 3	5.1624
LIF	LIF Interleukin 6 Family Cytokine	5.16072
CANX	Calnexin	5.15914
MAP3K4	Mitogen-Activated Protein Kinase Kinase Kinase 4	5.15899
TSC2	TSC Complex Subunit 2	5.15223
MT-RNR2	Mitochondrially Encoded 16S RRNA	5.15107
KCNE3	Potassium Voltage-Gated Channel Subfamily E Regulatory Subunit 3	5.15003
CXCL2	C-X-C Motif Chemokine Ligand 2	5.14989
RPS6KA1	Ribosomal Protein S6 Kinase A1	5.14956
UGT1A8	UDP Glucuronosyltransferase Family 1 Member A8	5.14564
HSPA2	Heat Shock Protein Family A (Hsp70) Member 2	5.14293
ILK	Integrin Linked Kinase	5.13659
CALB1	Calbindin 1	5.13258
HAMP	Hepcidin Antimicrobial Peptide	5.13158
MAP1LC3B	Microtubule Associated Protein 1 Light Chain 3 Beta	5.13128
CNR2	Cannabinoid Receptor 2	5.13025
SUMO1	Small Ubiquitin Like Modifier 1	5.12689
MC1R	Melanocortin 1 Receptor	5.12137
GPR132	G Protein-Coupled Receptor 132	5.1111
MTIF3	Mitochondrial Translational Initiation Factor 3	5.1092
FOXRED1	FAD Dependent Oxidoreductase Domain Containing 1	5.10364
PPA1	Inorganic Pyrophosphatase 1	5.10269
PEPD	Peptidase D	5.10158
COL13A1	Collagen Type XIII Alpha 1 Chain	5.09595
PPARGC1B	PPARG Coactivator 1 Beta	5.09136
CCNB1	Cyclin B1	5.09
IFNB1	Interferon Beta 1	5.08979
TIMP2	TIMP Metallopeptidase Inhibitor 2	5.08652
RNASEL	Ribonuclease L	5.08549
APOD	Apolipoprotein D	5.08307
CASK	Calcium/Calmodulin Dependent Serine Protein Kinase	5.08163
PIGA	Phosphatidylinositol Glycan Anchor Biosynthesis Class A	5.08079
ARL6IP5	ADP Ribosylation Factor Like GTPase 6 Interacting Protein 5	5.07723
CD4	CD4 Molecule	5.06716
TIMMDC1	Translocase Of Inner Mitochondrial Membrane Domain Containing 1	5.06385
IRS2	Insulin Receptor Substrate 2	5.06286
HIPK2	Homeodomain Interacting Protein Kinase 2	5.05869
PTX3	Pentraxin 3	5.05143
MIR17	MicroRNA 17	5.0489
IRAK1	Interleukin 1 Receptor Associated Kinase 1	5.04692
NAT1	N-Acetyltransferase 1	5.04262
FLNB	Filamin B	5.04196
F10	Coagulation Factor X	5.0398
MKNK1	MAPK Interacting Serine/Threonine Kinase 1	5.0393
FTMT	Ferritin Mitochondrial	5.03705
GSTA3	Glutathione S-Transferase Alpha 3	5.02967
NTF3	Neurotrophin 3	5.02792
TIMM50	Translocase Of Inner Mitochondrial Membrane 50	5.02568
ERO1B	Endoplasmic Reticulum Oxidoreductase 1 Beta	5.0244
CSDE1	Cold Shock Domain Containing E1	5.01806
TGFBR1	Transforming Growth Factor Beta Receptor 1	5.01804
PDK4	Pyruvate Dehydrogenase Kinase 4	5.01047
DNAJA1	DnaJ Heat Shock Protein Family (Hsp40) Member A1	5.00369
SERPINH1	Serpin Family H Member 1	4.99969
F7	Coagulation Factor VII	4.99495
PDP1	Pyruvate Dehydrogenase Phosphatase Catalytic Subunit 1	4.9938
PGF	Placental Growth Factor	4.99339
EGLN1	Egl-9 Family Hypoxia Inducible Factor 1	4.9922
ABL2	ABL Proto-Oncogene 2, Non-Receptor Tyrosine Kinase	4.98876
CYP51A1	Cytochrome P450 Family 51 Subfamily A Member 1	4.98647
PYCR2	Pyrroline-5-Carboxylate Reductase 2	4.97808
IYD	Iodotyrosine Deiodinase	4.97762
CTSG	Cathepsin G	4.97704
ITGB3	Integrin Subunit Beta 3	4.97611
CAMK2A	Calcium/Calmodulin Dependent Protein Kinase II Alpha	4.97514
FKRP	Fukutin Related Protein	4.97194
NDUFAF5	NADH:Ubiquinone Oxidoreductase Complex Assembly Factor 5	4.97178
CGB5	Chorionic Gonadotropin Subunit Beta 5	4.96984
SIK2	Salt Inducible Kinase 2	4.96966
PDGFRB	Platelet Derived Growth Factor Receptor Beta	4.96793
NDUFB7	NADH:Ubiquinone Oxidoreductase Subunit B7	4.96681
SULT1A3	Sulfotransferase Family 1A Member 3	4.96609
EIF2B4	Eukaryotic Translation Initiation Factor 2B Subunit Delta	4.96581
GUSB	Glucuronidase Beta	4.96555
ETS1	ETS Proto-Oncogene 1, Transcription Factor	4.96475
IL2RA	Interleukin 2 Receptor Subunit Alpha	4.96109
COL1A1	Collagen Type I Alpha 1 Chain	4.95787
ECI1	Enoyl-CoA Delta Isomerase 1	4.95727
HLA-G	Major Histocompatibility Complex, Class I, G	4.95588
PF4	Platelet Factor 4	4.95486
HSPE1	Heat Shock Protein Family E (Hsp10) Member 1	4.9538
PARP2	Poly(ADP-Ribose) Polymerase 2	4.95302
PNOC	Prepronociceptin	4.94571
MBP	Myelin Basic Protein	4.94551
IGHE	Immunoglobulin Heavy Constant Epsilon	4.94409
NDUFA5	NADH:Ubiquinone Oxidoreductase Subunit A5	4.93574
PDGFRA	Platelet Derived Growth Factor Receptor Alpha	4.93362
SMPD3	Sphingomyelin Phosphodiesterase 3	4.93351
ZZZ3	Zinc Finger ZZ-Type Containing 3	4.93196
NDNF	Neuron Derived Neurotrophic Factor	4.93138
CYP7B1	Cytochrome P450 Family 7 Subfamily B Member 1	4.92933
IL23A	Interleukin 23 Subunit Alpha	4.9273
SPG7	SPG7 Matrix AAA Peptidase Subunit, Paraplegin	4.92481
PAOX	Polyamine Oxidase	4.92191
LRP1	LDL Receptor Related Protein 1	4.92144
ENDOV	Endonuclease V	4.92111
MAP2	Microtubule Associated Protein 2	4.91441
MFN1	Mitofusin 1	4.91144
PKD1	Polycystin 1, Transient Receptor Potential Channel Interacting	4.90979
YWHAE	Tyrosine 3-Monooxygenase/Tryptophan 5-Monooxygenase Activation Protein Epsilon	4.90973
MT-ATP8	Mitochondrially Encoded ATP Synthase Membrane Subunit 8	4.90874
PRKG2	Protein Kinase CGMP-Dependent 2	4.90799
SUMO4	Small Ubiquitin Like Modifier 4	4.906
BOLA3	BolA Family Member 3	4.90555
SQOR	Sulfide Quinone Oxidoreductase	4.90506
LONP2	Lon Peptidase 2, Peroxisomal	4.90221
ARRB2	Arrestin Beta 2	4.90191
GADD45B	Growth Arrest And DNA Damage Inducible Beta	4.90117
NTRK1	Neurotrophic Receptor Tyrosine Kinase 1	4.89721
CSF3	Colony Stimulating Factor 3	4.89683
TRPC3	Transient Receptor Potential Cation Channel Subfamily C Member 3	4.89656
GAD1	Glutamate Decarboxylase 1	4.89321
MECP2	Methyl-CpG Binding Protein 2	4.88116
NCAM1	Neural Cell Adhesion Molecule 1	4.88069
APTX	Aprataxin	4.87975
EZR	Ezrin	4.87948
HSPA1L	Heat Shock Protein Family A (Hsp70) Member 1 Like	4.87431
GATA4	GATA Binding Protein 4	4.86869
CGAS	Cyclic GMP-AMP Synthase	4.86737
IL2RB	Interleukin 2 Receptor Subunit Beta	4.86255
TGFB3	Transforming Growth Factor Beta 3	4.86075
GYG1	Glycogenin 1	4.86026
MMP14	Matrix Metallopeptidase 14	4.85913
TPT1	Tumor Protein, Translationally-Controlled 1	4.85747
IL33	Interleukin 33	4.85613
UQCRC1	Ubiquinol-Cytochrome C Reductase Core Protein 1	4.85486
MT2A	Metallothionein 2A	4.85476
LOC107303340	3p25 Von Hippel-Lindau Tumor Suppressor, E3 Ubiquitin Protein Ligase Alu-Mediated Recombination Region	4.85304
GSTT2	Glutathione S-Transferase Theta 2 (Gene/Pseudogene)	4.85017
TMED4	Transmembrane P24 Trafficking Protein 4	4.84905
DVL2	Dishevelled Segment Polarity Protein 2	4.84789
SOCS1	Suppressor Of Cytokine Signaling 1	4.84622
CPT1C	Carnitine Palmitoyltransferase 1C	4.84197
COQ4	Coenzyme Q4	4.84062
PRKCE	Protein Kinase C Epsilon	4.83919
CYP4V2	Cytochrome P450 Family 4 Subfamily V Member 2	4.83731
PCSK9	Proprotein Convertase Subtilisin/Kexin Type 9	4.83689
HACL1	2-Hydroxyacyl-CoA Lyase 1	4.83166
EDF1	Endothelial Differentiation Related Factor 1	4.83032
FOXP3	Forkhead Box P3	4.82565
ALDH5A1	Aldehyde Dehydrogenase 5 Family Member A1	4.81961
UBA52	Ubiquitin A-52 Residue Ribosomal Protein Fusion Product 1	4.8193
MMP7	Matrix Metallopeptidase 7	4.81774
SLC11A2	Solute Carrier Family 11 Member 2	4.81304
IL5	Interleukin 5	4.80903
TPR	Translocated Promoter Region, Nuclear Basket Protein	4.80633
GAST	Gastrin	4.80043
ERCC1	ERCC Excision Repair 1, Endonuclease Non-Catalytic Subunit	4.79495
CSTB	Cystatin B	4.79372
PTGER2	Prostaglandin E Receptor 2	4.793
ABHD5	Abhydrolase Domain Containing 5, Lysophosphatidic Acid Acyltransferase	4.79077
UGT1A7	UDP Glucuronosyltransferase Family 1 Member A7	4.78983
CA3	Carbonic Anhydrase 3	4.78893
TUBB3	Tubulin Beta 3 Class III	4.78812
BCO2	Beta-Carotene Oxygenase 2	4.78713
BCL6	BCL6 Transcription Repressor	4.78447
CNTF	Ciliary Neurotrophic Factor	4.78295
KATNA1	Katanin Catalytic Subunit A1	4.78086
SCN1A	Sodium Voltage-Gated Channel Alpha Subunit 1	4.77492
NALCN	Sodium Leak Channel, Non-Selective	4.7676
DAO	D-Amino Acid Oxidase	4.76604
FPR1	Formyl Peptide Receptor 1	4.76416
IGF2BP3	Insulin Like Growth Factor 2 MRNA Binding Protein 3	4.75831
USP10	Ubiquitin Specific Peptidase 10	4.75736
NDUFAF4	NADH:Ubiquinone Oxidoreductase Complex Assembly Factor 4	4.75495
ALDH7A1	Aldehyde Dehydrogenase 7 Family Member A1	4.75486
UTS2	Urotensin 2	4.75302
SLC23A2	Solute Carrier Family 23 Member 2	4.75059
MIR124-1	MicroRNA 124-1	4.74831
DCN	Decorin	4.74691
ETHE1	ETHE1 Persulfide Dioxygenase	4.74544
NKX2-1	NK2 Homeobox 1	4.7396
KLHL41	Kelch Like Family Member 41	4.73592
PDE3B	Phosphodiesterase 3B	4.7358
MBTPS2	Membrane Bound Transcription Factor Peptidase, Site 2	4.73136
P2RY2	Purinergic Receptor P2Y2	4.73025
ISCA2	Iron-Sulfur Cluster Assembly 2	4.72789
FOXP2	Forkhead Box P2	4.72617
ACTG1	Actin Gamma 1	4.72495
ABCC3	ATP Binding Cassette Subfamily C Member 3	4.72312
ADD1	Adducin 1	4.72267
DHDH	Dihydrodiol Dehydrogenase	4.72247
GFPT1	Glutamine--Fructose-6-Phosphate Transaminase 1	4.72097
PRMT1	Protein Arginine Methyltransferase 1	4.71951
TGFA	Transforming Growth Factor Alpha	4.71845
CYP2U1	Cytochrome P450 Family 2 Subfamily U Member 1	4.7137
CLN3	CLN3 Lysosomal/Endosomal Transmembrane Protein, Battenin	4.71191
SIRT4	Sirtuin 4	4.70799
FGFR1	Fibroblast Growth Factor Receptor 1	4.70476
NUP62	Nucleoporin 62	4.70431
MKI67	Marker Of Proliferation Ki-67	4.70388
GRP	Gastrin Releasing Peptide	4.70299
DDX6	DEAD-Box Helicase 6	4.70133
GADD45G	Growth Arrest And DNA Damage Inducible Gamma	4.69943
VPS13B	Vacuolar Protein Sorting 13 Homolog B	4.69756
ACOT8	Acyl-CoA Thioesterase 8	4.69654
XPNPEP3	X-Prolyl Aminopeptidase 3	4.69553
FANCI	FA Complementation Group I	4.6951
TMEM126B	Transmembrane Protein 126B	4.69353
ENG	Endoglin	4.69305
GRN	Granulin Precursor	4.69276
PAK2	P21 (RAC1) Activated Kinase 2	4.68637
MSH2	MutS Homolog 2	4.68636
EIF2B3	Eukaryotic Translation Initiation Factor 2B Subunit Gamma	4.68361
TERF2	Telomeric Repeat Binding Factor 2	4.67735
PPP1CA	Protein Phosphatase 1 Catalytic Subunit Alpha	4.67667
NRP1	Neuropilin 1	4.67127
TMPO	Thymopoietin	4.66993
NLRP12	NLR Family Pyrin Domain Containing 12	4.66897
NEIL3	Nei Like DNA Glycosylase 3	4.66752
YTHDF3	YTH N6-Methyladenosine RNA Binding Protein 3	4.66182
ACAT1	Acetyl-CoA Acetyltransferase 1	4.66122
NR4A1	Nuclear Receptor Subfamily 4 Group A Member 1	4.65784
PI3	Peptidase Inhibitor 3	4.6577
SYT2	Synaptotagmin 2	4.65727
SLC12A2	Solute Carrier Family 12 Member 2	4.65697
LACC1	Laccase Domain Containing 1	4.65413
PDPK1	3-Phosphoinositide Dependent Protein Kinase 1	4.64802
SMUG1	Single-Strand-Selective Monofunctional Uracil-DNA Glycosylase 1	4.64605
APEH	Acylaminoacyl-Peptide Hydrolase	4.64365
CD69	CD69 Molecule	4.64242
ENO3	Enolase 3	4.64203
DNM3	Dynamin 3	4.6412
APLN	Apelin	4.63954
DDIT4	DNA Damage Inducible Transcript 4	4.63594
XRCC5	X-Ray Repair Cross Complementing 5	4.6337
TLDC2	TBC/LysM-Associated Domain Containing 2	4.6302
PHF3	PHD Finger Protein 3	4.62756
RHOD	Ras Homolog Family Member D	4.61852
DHX9	DExH-Box Helicase 9	4.61726
IGF2	Insulin Like Growth Factor 2	4.61052
ANXA1	Annexin A1	4.61032
SLC18A2	Solute Carrier Family 18 Member A2	4.6043
S100A1	S100 Calcium Binding Protein A1	4.60072
PLIN5	Perilipin 5	4.59998
HBG1	Hemoglobin Subunit Gamma 1	4.59951
CD163	CD163 Molecule	4.59923
COG2	Component Of Oligomeric Golgi Complex 2	4.59726
MOCS2	Molybdenum Cofactor Synthesis 2	4.59143
PDE2A	Phosphodiesterase 2A	4.59126
DRD4	Dopamine Receptor D4	4.59047
EIF2B1	Eukaryotic Translation Initiation Factor 2B Subunit Alpha	4.58985
NAPRT	Nicotinate Phosphoribosyltransferase	4.58492
CD86	CD86 Molecule	4.58436
DHFR	Dihydrofolate Reductase	4.58331
CFH	Complement Factor H	4.5831
XRCC6	X-Ray Repair Cross Complementing 6	4.58287
YWHAQ	Tyrosine 3-Monooxygenase/Tryptophan 5-Monooxygenase Activation Protein Theta	4.58076
UGT1A5	UDP Glucuronosyltransferase Family 1 Member A5	4.58074
INPP5D	Inositol Polyphosphate-5-Phosphatase D	4.58072
GJA4	Gap Junction Protein Alpha 4	4.58014
SLC6A2	Solute Carrier Family 6 Member 2	4.5758
STAT5A	Signal Transducer And Activator Of Transcription 5A	4.57568
TAOK3	TAO Kinase 3	4.57025
BDH2	3-Hydroxybutyrate Dehydrogenase 2	4.56878
SLC12A1	Solute Carrier Family 12 Member 1	4.56474
URM1	Ubiquitin Related Modifier 1	4.56387
SZT2	SZT2 Subunit Of KICSTOR Complex	4.56289
NDUFS5	NADH:Ubiquinone Oxidoreductase Subunit S5	4.56271
GLP1R	Glucagon Like Peptide 1 Receptor	4.56208
POLB	DNA Polymerase Beta	4.55982
ECSIT	ECSIT Signaling Integrator	4.55907
UBAP2L	Ubiquitin Associated Protein 2 Like	4.55895
PUS1	Pseudouridine Synthase 1	4.55744
TPH2	Tryptophan Hydroxylase 2	4.55722
SLC16A1	Solute Carrier Family 16 Member 1	4.55354
CD63	CD63 Molecule	4.55251
SERPING1	Serpin Family G Member 1	4.54906
NQO2	N-Ribosyldihydronicotinamide:Quinone Reductase 2	4.5467
CX3CR1	C-X3-C Motif Chemokine Receptor 1	4.5454
HNRNPA1	Heterogeneous Nuclear Ribonucleoprotein A1	4.54417
CPS1	Carbamoyl-Phosphate Synthase 1	4.54354
PDX1	Pancreatic And Duodenal Homeobox 1	4.54154
SLC27A2	Solute Carrier Family 27 Member 2	4.5396
MAFF	MAF BZIP Transcription Factor F	4.53524
CCAR2	Cell Cycle And Apoptosis Regulator 2	4.53503
MICAL2	Microtubule Associated Monooxygenase, Calponin And LIM Domain Containing 2	4.53333
AQP2	Aquaporin 2	4.53135
PHGDH	Phosphoglycerate Dehydrogenase	4.53066
ME2	Malic Enzyme 2	4.53055
CFL1	Cofilin 1	4.52766
PTGES3	Prostaglandin E Synthase 3	4.52724
PCCA	Propionyl-CoA Carboxylase Subunit Alpha	4.52647
GRM5	Glutamate Metabotropic Receptor 5	4.52297
NOD1	Nucleotide Binding Oligomerization Domain Containing 1	4.51918
DNAJC19	DnaJ Heat Shock Protein Family (Hsp40) Member C19	4.51818
CYB5R4	Cytochrome B5 Reductase 4	4.51782
SYP	Synaptophysin	4.51359
CD79A	CD79a Molecule	4.51335
ATG7	Autophagy Related 7	4.51243
SMARCA4	SWI/SNF Related, Matrix Associated, Actin Dependent Regulator Of Chromatin, Subfamily A, Member 4	4.50972
EGLN2	Egl-9 Family Hypoxia Inducible Factor 2	4.50856
MAP1LC3A	Microtubule Associated Protein 1 Light Chain 3 Alpha	4.50685
GLS2	Glutaminase 2	4.50299
PFKFB3	6-Phosphofructo-2-Kinase/Fructose-2,6-Biphosphatase 3	4.49953
IL18R1	Interleukin 18 Receptor 1	4.49932
NKX2-5	NK2 Homeobox 5	4.49737
LMNB1	Lamin B1	4.49654
ATF1	Activating Transcription Factor 1	4.49585
CYP2C18	Cytochrome P450 Family 2 Subfamily C Member 18	4.49267
HTR3A	5-Hydroxytryptamine Receptor 3A	4.48921
ACTN2	Actinin Alpha 2	4.48914
CD55	CD55 Molecule (Cromer Blood Group)	4.48844
REL	REL Proto-Oncogene, NF-KB Subunit	4.48739
NR1H3	Nuclear Receptor Subfamily 1 Group H Member 3	4.48665
TYRP1	Tyrosinase Related Protein 1	4.48458
NUP153	Nucleoporin 153	4.48412
RPA2	Replication Protein A2	4.48396
FGFR2	Fibroblast Growth Factor Receptor 2	4.48367
PSMC4	Proteasome 26S Subunit, ATPase 4	4.48037
SLC25A5	Solute Carrier Family 25 Member 5	4.47845
MMP12	Matrix Metallopeptidase 12	4.47804
LIMCH1	LIM And Calponin Homology Domains 1	4.47711
CAMK4	Calcium/Calmodulin Dependent Protein Kinase IV	4.47665
ENTPD1	Ectonucleoside Triphosphate Diphosphohydrolase 1	4.47613
DNAJC10	DnaJ Heat Shock Protein Family (Hsp40) Member C10	4.47177
TGFBR2	Transforming Growth Factor Beta Receptor 2	4.47058
PRRC2C	Proline Rich Coiled-Coil 2C	4.46965
ZMYND10	Zinc Finger MYND-Type Containing 10	4.46724
ECPAS	Ecm29 Proteasome Adaptor And Scaffold	4.4631
GP6	Glycoprotein VI Platelet	4.46057
NCL	Nucleolin	4.45957
MGMT	O-6-Methylguanine-DNA Methyltransferase	4.45909
LOXL4	Lysyl Oxidase Like 4	4.45749
NES	Nestin	4.4574
ACAD10	Acyl-CoA Dehydrogenase Family Member 10	4.45668
HTR2B	5-Hydroxytryptamine Receptor 2B	4.45596
KDM1A	Lysine Demethylase 1A	4.4546
SIRPA	Signal Regulatory Protein Alpha	4.45377
OTC	Ornithine Transcarbamylase	4.45204
ECI2	Enoyl-CoA Delta Isomerase 2	4.44672
PCCB	Propionyl-CoA Carboxylase Subunit Beta	4.44667
CST3	Cystatin C	4.44469
HDAC6	Histone Deacetylase 6	4.44366
WT1	WT1 Transcription Factor	4.4402
SLC7A2	Solute Carrier Family 7 Member 2	4.43838
GSTA5	Glutathione S-Transferase Alpha 5	4.43729
ATP1A1	ATPase Na+/K+ Transporting Subunit Alpha 1	4.43269
CHD6	Chromodomain Helicase DNA Binding Protein 6	4.43177
NDUFV3	NADH:Ubiquinone Oxidoreductase Subunit V3	4.43107
DHX36	DEAH-Box Helicase 36	4.43053
NF1	Neurofibromin 1	4.42923
SPAG5	Sperm Associated Antigen 5	4.42799
ADIPOR2	Adiponectin Receptor 2	4.42748
TAB2	TGF-Beta Activated Kinase 1 (MAP3K7) Binding Protein 2	4.42622
MCU	Mitochondrial Calcium Uniporter	4.4256
CETP	Cholesteryl Ester Transfer Protein	4.42159
TBCD	Tubulin Folding Cofactor D	4.42152
CSNK2A1	Casein Kinase 2 Alpha 1	4.41429
AGPS	Alkylglycerone Phosphate Synthase	4.41136
ATP5F1B	ATP Synthase F1 Subunit Beta	4.41029
HSPB6	Heat Shock Protein Family B (Small) Member 6	4.41022
ABAT	4-Aminobutyrate Aminotransferase	4.40688
SERPINA4	Serpin Family A Member 4	4.40352
PHB1	Prohibitin 1	4.40175
PNPLA8	Patatin Like Phospholipase Domain Containing 8	4.3999
SOX9	SRY-Box Transcription Factor 9	4.39862
KCNT1	Potassium Sodium-Activated Channel Subfamily T Member 1	4.39701
CREB3L3	CAMP Responsive Element Binding Protein 3 Like 3	4.39653
CSN1S1	Casein Alpha S1	4.39439
DNAJB9	DnaJ Heat Shock Protein Family (Hsp40) Member B9	4.39411
MEOX2	Mesenchyme Homeobox 2	4.38949
RBCK1	RANBP2-Type And C3HC4-Type Zinc Finger Containing 1	4.38223
TIMELESS	Timeless Circadian Regulator	4.38111
ACTC1	Actin Alpha Cardiac Muscle 1	4.37745
NPR1	Natriuretic Peptide Receptor 1	4.37534
CYP2R1	Cytochrome P450 Family 2 Subfamily R Member 1	4.37371
SCN2A	Sodium Voltage-Gated Channel Alpha Subunit 2	4.373
CTLA4	Cytotoxic T-Lymphocyte Associated Protein 4	4.37287
GNAS	GNAS Complex Locus	4.3695
HSD11B2	Hydroxysteroid 11-Beta Dehydrogenase 2	4.36777
TMEM70	Transmembrane Protein 70	4.36539
TNNI3	Troponin I3, Cardiac Type	4.36492
GNRH1	Gonadotropin Releasing Hormone 1	4.36181
LRP2	LDL Receptor Related Protein 2	4.36152
PTGES	Prostaglandin E Synthase	4.36134
RPE65	Retinoid Isomerohydrolase RPE65	4.36071
CD47	CD47 Molecule	4.35989
LBP	Lipopolysaccharide Binding Protein	4.35292
TNFAIP3	TNF Alpha Induced Protein 3	4.35282
ADIPOR1	Adiponectin Receptor 1	4.35115
OPRD1	Opioid Receptor Delta 1	4.35092
CD68	CD68 Molecule	4.34849
GLRX3	Glutaredoxin 3	4.34802
TPI1	Triosephosphate Isomerase 1	4.3475
FKBP1A	FKBP Prolyl Isomerase 1A	4.3459
ALDOA	Aldolase, Fructose-Bisphosphate A	4.3442
CXCL9	C-X-C Motif Chemokine Ligand 9	4.34378
FANCC	FA Complementation Group C	4.34157
CCL17	C-C Motif Chemokine Ligand 17	4.3409
ACAN	Aggrecan	4.33688
ADAM17	ADAM Metallopeptidase Domain 17	4.33471
GNAI1	G Protein Subunit Alpha I1	4.33293
HTR1B	5-Hydroxytryptamine Receptor 1B	4.33092
AHCY	Adenosylhomocysteinase	4.329
NUDT15	Nudix Hydrolase 15	4.32861
PEX19	Peroxisomal Biogenesis Factor 19	4.3246
ACSL3	Acyl-CoA Synthetase Long Chain Family Member 3	4.32312
LIPC	Lipase C, Hepatic Type	4.32271
ATG4B	Autophagy Related 4B Cysteine Peptidase	4.32032
SHH	Sonic Hedgehog Signaling Molecule	4.31873
HSPH1	Heat Shock Protein Family H (Hsp110) Member 1	4.31816
DIABLO	Diablo IAP-Binding Mitochondrial Protein	4.31724
ATG5	Autophagy Related 5	4.31575
DHODH	Dihydroorotate Dehydrogenase (Quinone)	4.31568
CACNA1D	Calcium Voltage-Gated Channel Subunit Alpha1 D	4.30832
STAR	Steroidogenic Acute Regulatory Protein	4.30595
SKP1	S-Phase Kinase Associated Protein 1	4.3047
JPH2	Junctophilin 2	4.30055
VRK2	VRK Serine/Threonine Kinase 2	4.29849
TRPC1	Transient Receptor Potential Cation Channel Subfamily C Member 1	4.29847
DERL2	Derlin 2	4.29789
ACAD8	Acyl-CoA Dehydrogenase Family Member 8	4.29514
BMPR2	Bone Morphogenetic Protein Receptor Type 2	4.295
COX6C	Cytochrome C Oxidase Subunit 6C	4.2939
LOC111258525	NOS1 1f And 1g Alternate Promoter Region	4.29328
GNAQ	G Protein Subunit Alpha Q	4.29273
ABCC8	ATP Binding Cassette Subfamily C Member 8	4.28992
BDKRB1	Bradykinin Receptor B1	4.28698
MYOG	Myogenin	4.28651
GP1BA	Glycoprotein Ib Platelet Subunit Alpha	4.28351
PNMT	Phenylethanolamine N-Methyltransferase	4.2811
RYR3	Ryanodine Receptor 3	4.2775
MIR29A	MicroRNA 29a	4.27299
CHCHD3	Coiled-Coil-Helix-Coiled-Coil-Helix Domain Containing 3	4.27122
GAP43	Growth Associated Protein 43	4.26973
WARS1	Tryptophanyl-TRNA Synthetase 1	4.26805
LEPR	Leptin Receptor	4.26549
SLC19A3	Solute Carrier Family 19 Member 3	4.26093
ADORA1	Adenosine A1 Receptor	4.26012
NSF	N-Ethylmaleimide Sensitive Factor, Vesicle Fusing ATPase	4.25975
KIF1B	Kinesin Family Member 1B	4.25685
GPD1L	Glycerol-3-Phosphate Dehydrogenase 1 Like	4.25425
TFAP2A	Transcription Factor AP-2 Alpha	4.25358
NMRAL1	NmrA Like Redox Sensor 1	4.25323
MIR195	MicroRNA 195	4.25126
PPM1D	Protein Phosphatase, Mg2+/Mn2+ Dependent 1D	4.24755
RECQL	RecQ Like Helicase	4.24679
ALDH1L1	Aldehyde Dehydrogenase 1 Family Member L1	4.24516
SREBF2	Sterol Regulatory Element Binding Transcription Factor 2	4.24394
FABP1	Fatty Acid Binding Protein 1	4.23947
PGR	Progesterone Receptor	4.23899
SLC9A1	Solute Carrier Family 9 Member A1	4.23812
RLBP1	Retinaldehyde Binding Protein 1	4.23795
UFL1	UFM1 Specific Ligase 1	4.23527
H4C16	H4 Histone 16	4.23497
ITGB4	Integrin Subunit Beta 4	4.2329
TACR2	Tachykinin Receptor 2	4.23028
ACTN1	Actinin Alpha 1	4.23004
CKM	Creatine Kinase, M-Type	4.22989
RELB	RELB Proto-Oncogene, NF-KB Subunit	4.22964
ACP5	Acid Phosphatase 5, Tartrate Resistant	4.22706
THPO	Thrombopoietin	4.2259
LOC107133510	Origin Of Replication At HBB	4.22526
PTPN2	Protein Tyrosine Phosphatase Non-Receptor Type 2	4.22377
RAP1A	RAP1A, Member Of RAS Oncogene Family	4.22163
MT-RNR1	Mitochondrially Encoded 12S RRNA	4.21774
MPV17	Mitochondrial Inner Membrane Protein MPV17	4.21762
COX4I2	Cytochrome C Oxidase Subunit 4I2	4.21705
GRM1	Glutamate Metabotropic Receptor 1	4.21699
ORAI1	ORAI Calcium Release-Activated Calcium Modulator 1	4.21237
ACTA2	Actin Alpha 2, Smooth Muscle	4.20749
CD46	CD46 Molecule	4.20533
SLC6A6	Solute Carrier Family 6 Member 6	4.19785
FBH1	F-Box DNA Helicase 1	4.19316
HLA-DRB1	Major Histocompatibility Complex, Class II, DR Beta 1	4.19134
STING1	Stimulator Of Interferon Response CGAMP Interactor 1	4.19028
HABP4	Hyaluronan Binding Protein 4	4.18869
AHCYL1	Adenosylhomocysteinase Like 1	4.18832
FBXW7	F-Box And WD Repeat Domain Containing 7	4.18819
HSD3B2	Hydroxy-Delta-5-Steroid Dehydrogenase, 3 Beta- And Steroid Delta-Isomerase 2	4.18754
MTF1	Metal Regulatory Transcription Factor 1	4.18617
STIM1	Stromal Interaction Molecule 1	4.18546
NRAS	NRAS Proto-Oncogene, GTPase	4.18477
KRT8	Keratin 8	4.18433
NDUFA7	NADH:Ubiquinone Oxidoreductase Subunit A7	4.18342
LGALS1	Galectin 1	4.18137
CALB2	Calbindin 2	4.18094
HNRNPK	Heterogeneous Nuclear Ribonucleoprotein K	4.17053
VEGFC	Vascular Endothelial Growth Factor C	4.16937
LIMA1	LIM Domain And Actin Binding 1	4.16542
BTD	Biotinidase	4.16407
TOMM20	Translocase Of Outer Mitochondrial Membrane 20	4.16401
TP63	Tumor Protein P63	4.1596
SDC4	Syndecan 4	4.15936
BAG6	BAG Cochaperone 6	4.15437
ADORA2B	Adenosine A2b Receptor	4.15403
PRKACA	Protein Kinase CAMP-Activated Catalytic Subunit Alpha	4.14854
SLC40A1	Solute Carrier Family 40 Member 1	4.14825
DERL1	Derlin 1	4.14444
LALBA	Lactalbumin Alpha	4.14257
MYB	MYB Proto-Oncogene, Transcription Factor	4.14068
TPK1	Thiamin Pyrophosphokinase 1	4.14006
SOAT1	Sterol O-Acyltransferase 1	4.13626
UBE2D3	Ubiquitin Conjugating Enzyme E2 D3	4.13593
RUVBL2	RuvB Like AAA ATPase 2	4.1329
CALCRL	Calcitonin Receptor Like Receptor	4.13048
EDN3	Endothelin 3	4.12981
AMPD3	Adenosine Monophosphate Deaminase 3	4.12962
FURIN	Furin, Paired Basic Amino Acid Cleaving Enzyme	4.12807
MVK	Mevalonate Kinase	4.12749
CDC37	Cell Division Cycle 37, HSP90 Cochaperone	4.12723
PTGIR	Prostaglandin I2 Receptor	4.12383
ABCB10	ATP Binding Cassette Subfamily B Member 10	4.1167
PLK1	Polo Like Kinase 1	4.11668
UNC45B	Unc-45 Myosin Chaperone B	4.1133
USP9X	Ubiquitin Specific Peptidase 9 X-Linked	4.11328
TIPIN	TIMELESS Interacting Protein	4.11222
SLC2A3	Solute Carrier Family 2 Member 3	4.11162
B2M	Beta-2-Microglobulin	4.11131
FGF21	Fibroblast Growth Factor 21	4.11118
CACNA2D1	Calcium Voltage-Gated Channel Auxiliary Subunit Alpha2delta 1	4.10955
XPC	XPC Complex Subunit, DNA Damage Recognition And Repair Factor	4.10864
IL9	Interleukin 9	4.10681
SMPD4	Sphingomyelin Phosphodiesterase 4	4.1047
JAG1	Jagged Canonical Notch Ligand 1	4.10291
PLA2G3	Phospholipase A2 Group III	4.09773
DSC3	Desmocollin 3	4.0957
EIF2B2	Eukaryotic Translation Initiation Factor 2B Subunit Beta	4.09224
MOCS1	Molybdenum Cofactor Synthesis 1	4.09213
FBXW11	F-Box And WD Repeat Domain Containing 11	4.089
ETV5	ETS Variant Transcription Factor 5	4.08537
PGK1	Phosphoglycerate Kinase 1	4.0847
PEX13	Peroxisomal Biogenesis Factor 13	4.08107
HSCB	HscB Mitochondrial Iron-Sulfur Cluster Cochaperone	4.07793
S100A13	S100 Calcium Binding Protein A13	4.07136
CLCN2	Chloride Voltage-Gated Channel 2	4.07099
MIR148A	MicroRNA 148a	4.07035
APOC3	Apolipoprotein C3	4.07031
GGA2	Golgi Associated, Gamma Adaptin Ear Containing, ARF Binding Protein 2	4.07006
COX6A1	Cytochrome C Oxidase Subunit 6A1	4.06677
IBA57	Iron-Sulfur Cluster Assembly Factor IBA57	4.0655
HK2	Hexokinase 2	4.065
CLCN1	Chloride Voltage-Gated Channel 1	4.06439
SESN3	Sestrin 3	4.06007
ERMP1	Endoplasmic Reticulum Metallopeptidase 1	4.0567
PAFAH2	Platelet Activating Factor Acetylhydrolase 2	4.0546
CDK9	Cyclin Dependent Kinase 9	4.05412
CLPB	Caseinolytic Mitochondrial Matrix Peptidase Chaperone Subunit B	4.05334
ITGAX	Integrin Subunit Alpha X	4.04988
GPHN	Gephyrin	4.04735
AK4	Adenylate Kinase 4	4.0456
ADNP2	ADNP Homeobox 2	4.04479
AARS1	Alanyl-TRNA Synthetase 1	4.04449
CERKL	Ceramide Kinase Like	4.04429
AGAP3	ArfGAP With GTPase Domain, Ankyrin Repeat And PH Domain 3	4.04311
AMPD1	Adenosine Monophosphate Deaminase 1	4.04287
TSC1	TSC Complex Subunit 1	4.0427
NONO	Non-POU Domain Containing Octamer Binding	4.0408
MATN1	Matrilin 1	4.03905
LOC107372315	OSGEP/APEX1 Bi-Directional Promoter Region	4.03622
PPP1CC	Protein Phosphatase 1 Catalytic Subunit Gamma	4.03515
UTRN	Utrophin	4.03495
YAP1	Yes1 Associated Transcriptional Regulator	4.03345
AHDC1	AT-Hook DNA Binding Motif Containing 1	4.03009
UBE2D1	Ubiquitin Conjugating Enzyme E2 D1	4.02983
ATP7A	ATPase Copper Transporting Alpha	4.02589
MIR132	MicroRNA 132	4.02588
EPOR	Erythropoietin Receptor	4.02474
F2R	Coagulation Factor II Thrombin Receptor	4.02267
MMAA	Metabolism Of Cobalamin Associated A	4.02026
NFKB2	Nuclear Factor Kappa B Subunit 2	4.01765
CD34	CD34 Molecule	4.0167
OSM	Oncostatin M	4.01558
AZIN2	Antizyme Inhibitor 2	4.01506
LOC106099062	HBB Recombination Region	4.01099
CD38	CD38 Molecule	4.00648
AMACR	Alpha-Methylacyl-CoA Racemase	4.00462
MPG	N-Methylpurine DNA Glycosylase	4.00456
ADORA3	Adenosine A3 Receptor	4.00224
RC3H2	Ring Finger And CCCH-Type Domains 2	4.00199
